# Supplementary material
Source: PubMed Central journal article supplement (PMC6726531)
Supplement: NIHMS1528831-supplement-1.pdf [file NIHMS1528831-supplement-1.pdf]

## **SUPPLEMENTARY INFORMATION**

### **A-SUPPLEMENTARY METHODS**

#### **B- SUPPLEMENTARY TABLES**

**Supplementary Table S1.** Demographics of patients from clinical trial NCT01876511

**Supplementary Table S2.** Demographics of untreated CRC patients

**Supplementary Table S3.** Target genes and specific primer/probes gene expression assay used for Taqman PCR

**Supplementary Table S4.** Summary statistics of immune related gene expression between responder (R) and non-responder (NR) mCRC treated with pembrolizumab, sorted by Wilcoxon-Mann Whitney p-value

**Supplementary Table S5.** Significant p values ( $p < 0.05$ ) of gene expression between newly defined R-type and NR-type MMRp specimens.

**Supplementary Table S6.** Summary statistics for paired differences of gene expression between cell-sorted CD8<sup>+</sup> PD1<sup>hi</sup> and CD8<sup>+</sup> PD1<sup>lo</sup> TILs of resected primary CRC. Gene expression in PD1<sup>hi</sup> and PD1<sup>lo</sup> were relative to expression in PD1<sup>neg</sup> CD8<sup>+</sup> TILs ( $\Delta\Delta Ct$ ).

**Supplementary Table S7.** Th1 and mixed Th1/Th17 immune signatures in MSS samples extracted from TCGA database

#### **C-SUPPLEMENTARY FIGURES**

**Supplementary Figure S1.** Model of TIME in primary colon tumor of mCRC patients according to their clinical response to pembrolizumab.

**Supplementary Figure S2.** IFN $\gamma$ -producing PD1<sup>hi</sup> CD8<sup>+</sup> T cells are not detected in the distal normal colon tissue.

**Supplementary Figure S3.** Cell-sorted PD1<sup>hi</sup>CD8<sup>+</sup> TIL in CRC are exhausted T cells.

**Supplementary figure S4.** MSI high MMRd CRC 3784 TIL includes only few IFN $\gamma$ <sup>+</sup>PD1<sup>hi</sup> CD4<sup>+</sup> or CD8<sup>+</sup> T cells.

**Supplementary Figure S5.** Gene expression analysis in conventional MMRp, type 1 immunoreactive MMRp and type 17 immunoreactive MMRp colon tumors.

**Supplementary Figure S6.** IHC staining on type 17 immunoreactive MMRp CRC.

**Supplementary Figure S7.** IHC staining on conventional MMRp CRC.

**Supplementary Figure S8.** Correlation between the PD-L1 expression in IF of primary colon tumors and the proportion of Th1 and Th17 in TILs.

**Supplementary Figure S9.** CD3 and CD8 cells quantification by IHC and tumor mutation numbers in untreated resected primary CRC lesion.

**Supplementary Figure S10.** Detection of Type 1 and Type 17 immunoreactive MMRp CRC samples in TCGA database.

## SUPPLEMENTARY METHODS

### Detection of Type 1 and Type 17 immunoreactive MMRp CRC samples in TCGA.

Gene expression data were obtained for 176 MSS colorectal cancer participants from the PanCancer Atlas consortium, available at the publication page (<https://gdc.cancer.gov/about-data/publications/pancanatlas>). Data matrices were standardized, normalized, and batch corrected using the “TCGAbiolinks” package(1). “IFNG”, “RORC”, “IL17A”, “TBX21”, “IL23R” and “IDO1” genes were categorized into “positive” and “negative” based on their expression distribution (local minimum in bimodal distribution, and median in unimodal distribution as cut off value) was used to define "**Type 1**" (Th1 signature= *IFNG*+ and/or *TBX21*+ and/or *IDO1*+), "**Type 17**" (Th1/Th17 mixed signature: [*IFNG*+ and/or *TBX21*+ and/or *IDO1*+] + [*RORC*+ and/or *IL17A*+ and/or *IL23R*+]) and “Others” MSS CRC (**supplementary table 7**). The number of patients in each immune signature category was calculated and visualized in pie chart (**supplementary Fig.S10**).

### References

1. Colaprico A, Silva TC, Olsen C, Garofano L, Cava C, Garolini D, et al. TCGAbiolinks: an R/Bioconductor package for integrative analysis of TCGA data. *Nucleic Acids Res.* 2016;44:e71.

**Table S1. Demographics of patients from clinical trial NCT01876511**

| Arm <sup>a</sup> | Pt ID | Age | Gender | Race <sup>b</sup> | Ethnicity    | Disease    | Stage (On study) | Differentiation <sup>c</sup> | Histology      | KRAS <sup>d</sup> | BRAF <sup>d</sup> | Somatic mutations |
|------------------|-------|-----|--------|-------------------|--------------|------------|------------------|------------------------------|----------------|-------------------|-------------------|-------------------|
| A MSI            | 1-001 | 65  | Female | AA                | non-Hispanic | Colorectal | IV               | Poor                         | adenocarcinoma | Mut               | WT                | 1291              |
| B MSS            | 1-007 | 79  | Male   | White             | non-Hispanic | Colorectal | IV               | Mod                          | Adenocarcinoma | Mut               | WT                | 67                |
| B MSS            | 1-010 | 65  | Female | White             | non-Hispanic | Colorectal | IV               | Mod                          | Adenocarcinoma | WT                | Mut               | 118               |
| B MSS            | 1-014 | 71  | Male   | White             | non-Hispanic | Colorectal | IV               | Mod                          | Adenocarcinoma | Mut               | WT                | NA                |
| A MSI            | 1-015 | 39  | Male   | Asian             | non-Hispanic | Colorectal | IV               | Poor                         | Adenocarcinoma | Mut               | WT                | 2345              |
| A MSI            | 1-016 | 51  | Male   | White             | non-Hispanic | Colorectal | IV               | Poor                         | Adenocarcinoma | WT                | WT                | 4025              |
| B MSS            | 1-017 | 53  | Female | White             | non-Hispanic | Colorectal | IV               | Poor                         | Adenocarcinoma | Mut               | WT                | 70                |
| B MSS            | 1-018 | 32  | Male   | White             | non-Hispanic | Colorectal | IV               | Mod                          | Adenocarcinoma | WT                | WT                | NA                |
| A MSI            | 1-019 | 64  | Female | White             | non-Hispanic | Colorectal | IV               | Mod                          | Adenocarcinoma | WT                | WT                | 1477              |
| B MSS            | 1-021 | 66  | Female | White             | non-Hispanic | Colorectal | IV               | Mod                          | Adenocarcinoma | WT                | WT                | 77                |
| B MSS            | 1-022 | 67  | Male   | AA                | non-Hispanic | Colorectal | IV               | Mod                          | Adenocarcinoma | WT                | WT                | 102               |
| B MSS            | 1-028 | 39  | Male   | White             | non-Hispanic | Colorectal | IV               | Mod                          | Adenocarcinoma | Mut               | WT                | 65                |
| A MSI            | 1-031 | 24  | Female | White             | non-Hispanic | Colorectal | IV               | Mod                          | Adenocarcinoma | Mut               | WT                | 941               |
| B MSS            | 1-032 | 50  | Female | White             | non-Hispanic | Colorectal | IV               | Mod                          | Adenocarcinoma | Mut               | WT                | 26                |
| B MSS            | 1-037 | 47  | Male   | White             | non-Hispanic | Colorectal | IV               | Poor                         | Adenocarcinoma | WT                | WT                | 83                |
| B MSS            | 1-038 | 61  | Male   | White             | non-Hispanic | Colorectal | IV               | Mod                          | Adenocarcinoma | WT                | WT                | 76                |
| B MSS            | 1-040 | 70  | Male   | White             | non-Hispanic | Colorectal | IV               | Mod                          | Adenocarcinoma | WT                | WT                | 109               |
| A MSI            | 1-052 | 47  | Male   | AA                | non-Hispanic | Colorectal | IV               | Poor                         | Adenocarcinoma | WT                | WT                | 478               |
| A MSI            | 1-110 | 50  | Male   | White             | non-Hispanic | Colorectal | IV               | Poor                         | Adenocarcinoma | WT                | Mut               | NA                |

<sup>a</sup>, Cohorts of the clinical trial NCT01876511: A, MSI CRC; B, MSS CRC

<sup>b</sup>, AA, African-American

<sup>c</sup>, Poor, poor differentiation; Mod, moderate differentiation; Well, well differentiated

<sup>d</sup>, Mut, mutated; WT, wild type

Table S2. Demographics of untreated CRC patients

| MMRp CRC (n=25) |     |        |                   |       |           |                                                      |         |         |
|-----------------|-----|--------|-------------------|-------|-----------|------------------------------------------------------|---------|---------|
| Pt ID           | Age | Gender | Race <sup>a</sup> | Stage | Size (mm) | Histology                                            | Kras    | BRAF    |
| 3735            | 64  | M      | W                 | 3     | 70        | Adenocarcinoma (low grade)                           | Mutated | WT      |
| 3754            | 72  | F      | AA                | 2     | 30        | Adenocarcinoma (high grade)                          | WT      | Mutated |
| 3752            | 80  | F      | W                 | 2     | 25        | Adenocarcinoma (low grade)                           | Mutated | WT      |
| 3725            | 50  | F      | W                 | 4     | 80        | Adenocarcinoma (low grade)                           | Mutated | WT      |
| 3739            | 46  | F      | W                 | 3     | 54        | Adenocarcinoma (low grade)                           | WT      | WT      |
| 3743            | 91  | F      | W                 | 3     | 30        | Adenocarcinoma (low grade)                           | Mutated | WT      |
| 3749            | 40  | M      | W                 | 3     | 50        | Adenocarcinoma (low grade)                           | WT      | WT      |
| 3753            | 55  | F      | AA                | 4     | 47        | Adenocarcinoma w/focal mucinous features (low grade) | WT      | WT      |
| 3756            | 61  | M      | W                 | 4     | 45        | Adenocarcinoma (low grade)                           | WT      | WT      |
| 3760            | 35  | F      | W                 | 2     | 80        | Adenocarcinoma (low grade)                           | WT      | WT      |
| 3762            | 74  | M      | W                 | 4     | 54        | Adenocarcinoma (low grade)                           | WT      | WT      |
| 3763            | 73  | F      | W                 | 2     | 30        | Adenocarcinoma (low grade)                           | WT      | WT      |
| 3764            | 65  | F      | W                 | 4     | 22        | Adenocarcinoma (low grade)                           | WT      | WT      |
| 3766            | 63  | F      | W                 | 4     | 55        | Adenocarcinoma (low grade)                           | WT      | WT      |
| 3768            | 51  | M      | AA                | 4     | 42        | Adenocarcinoma, NOS (low grade)                      | Mutated | WT      |
| 3785            | 60  | F      | W                 | 3     | 40        | Adenocarcinoma (low grade)                           | WT      | WT      |
| 3789            | 61  | M      | O                 | 3     | 50        | Adenocarcinoma (low grade)                           | WT      | WT      |
| 3972            | 85  | M      | W                 | 3     | 40        | Adenocarcinoma (high grade)                          | Mutated | WT      |
| 3977            | 45  | F      | W                 | 1     | 50        | Adenocarcinoma (low grade)                           | WT      | WT      |
| 3979            | 83  | F      | AA                | 3     | 35        | Adenocarcinoma (low grade)                           | Mutated | WT      |
| 4039            | 62  | F      | A                 | 3     | 95        | Adenocarcinoma (low grade)                           | Mutated | WT      |
| 4042            | 61  | M      | W                 | 3     | 90        | Adenocarcinoma (low grade)                           | Mutated | WT      |
| 4074            | 81  | M      | A                 | 1     | 65        | Adenocarcinoma (low grade)                           | N/A     | N/A     |
| 4084            | 67  | M      | AA                | 2     | 60        | Adenocarcinoma (low grade)                           | Mutated | N/A     |
| 4139            | 73  | F      | W                 | 2     | 80        | Adenocarcinoma (low grade)                           | N/A     | N/A     |

| MMRd CRC (n=11) |     |        |      |       |           |                                                     |         |         |
|-----------------|-----|--------|------|-------|-----------|-----------------------------------------------------|---------|---------|
| Pt ID           | Age | Gender | Race | Stage | Size (mm) | Histology                                           | Kras    | BRAF    |
| 3774            | 51  | M      | O    | 2     | 45        | Adenocarcinoma w/ medullary features (high grade)   | WT      | WT      |
| 3976            | 61  | F      | W    | 1     | 20        | Adenocarcinoma, focal mucinous features (low grade) | Mutated | WT      |
| 3982            | 68  | M      | W    | 2     | 45        | Adenocarcinoma, mucinous features (low grade)       | WT      | WT      |
| 3987            | 71  | F      | W    | 2     | 50        | Adenocarcinoma w/ mucinous features                 | WT      | Mutated |
| 3992            | 97  | F      | W    | 2     | 45        | Adenocarcinoma (high grade)                         | WT      | Mutated |
| 3996            | 73  | F      | W    | 1     | 20        | Adenocarcinoma (low grade)                          | WT      | WT      |
| 3997            | 33  | M      | O    | 4     | 63        | Adenocarcinoma (Moderately differentiated )         | WT      | WT      |
| 3998            | 84  | F      | W    | 2     | 72        | Adenocarcinoma (low grade)                          | Mutated | WT      |
| 4089            | 63  | M      | W    | 1     | 30        | Adenocarcinoma (low grade)                          | N/A     | N/A     |
| 4095            | 50  | M      | W    | 1     | 45        | Adenocarcinoma (low grade)                          | N/A     | N/A     |
| 4100            | 67  | F      | W    | 2     | 43        | Adenocarcinoma (low grade)                          | N/A     | N/A     |

**Table S3.** Target genes and specific primer/probes gene expression assay used for Taqman-PCR.

**A. taqman IR gene expression assays used for whole tumor tissue**

|   | 1                         | 2                       | 3                      | 4                       | 5                      | 6                      | 7                         | 8                       | 9                      | 10                      | 11                     | 12                     |
|---|---------------------------|-------------------------|------------------------|-------------------------|------------------------|------------------------|---------------------------|-------------------------|------------------------|-------------------------|------------------------|------------------------|
| A | Hs99999901_s1<br>18s rRNA | Hs99999905_m1<br>GAPDH  | Hs99999909_m1<br>HPRT  | Hs99999908_m1<br>GUSB   | Hs00998130_m1<br>TGFB1 | Hs00922328_m1<br>GATA3 | Hs99999901_s1<br>18s rRNA | Hs99999905_m1<br>GAPDH  | Hs99999909_m1<br>HPRT  | Hs99999908_m1<br>GUSB   | Hs00998130_m1<br>TGFB1 | Hs00922328_m1<br>GATA3 |
| B | Hs00167257_m1<br>NOS2     | Hs00174143_m1<br>IFNG   | Hs00174131_m1<br>IL6   | Hs99999029_m1<br>IL1B   | Hs00158563_m1<br>LAG3  | Hs00174383_m1<br>IL17A | Hs00167257_m1<br>NOS2     | Hs00174143_m1<br>IFNG   | Hs00174131_m1<br>IL6   | Hs99999029_m1<br>IL1B   | Hs00158563_m1<br>LAG3  | Hs00174383_m1<br>IL17A |
| C | Hs00158032_m1<br>IDO1     | Hs00153153_m1<br>HIF1A  | Hs99999197_m1<br>CSF1R | Hs99999040_m1<br>IL18   | Hs00174086_m1<br>IL10  | Hs00172858_m1<br>RORC  | Hs00158032_m1<br>IDO1     | Hs00153153_m1<br>HIF1A  | Hs99999197_m1<br>CSF1R | Hs99999040_m1<br>IL18   | Hs00174086_m1<br>IL10  | Hs00172858_m1<br>RORC  |
| D | Hs00220924_m1<br>IL22     | Hs00182411_m1<br>TNFSF4 | Hs00222327_m1<br>IL21  | Hs03987537_m1<br>FOXP3  | Hs00372324_m1<br>IL23A | Hs00894391_g1<br>TBX21 | Hs00220924_m1<br>IL22     | Hs00182411_m1<br>TNFSF4 | Hs00222327_m1<br>IL21  | Hs03987537_m1<br>FOXP3  | Hs00372324_m1<br>IL23A | Hs00894391_g1<br>TBX21 |
| E | Hs00957555_m1<br>MMP9     | Hs00968979_m1<br>ARG1   | Hs00212361_m1<br>IKZF2 | Hs00223842_m1<br>IKZF4  | Hs00169473_m1<br>PRF1  | Hs01573474_g1<br>PTGS2 | Hs00957555_m1<br>MMP9     | Hs00968979_m1<br>ARG1   | Hs00212361_m1<br>IKZF2 | Hs00223842_m1<br>IKZF4  | Hs00169473_m1<br>PRF1  | Hs01573474_g1<br>PTGS2 |
| F | Hs00169472_m1<br>PDCD1    | Hs00181217_m1<br>CD4    | Hs00233520_m1<br>CD8A  | Hs01125301_m1<br>CD274  | Hs99999043_m1<br>TNF   | Hs00401201_m1<br>IDO2  | Hs00169472_m1<br>PDCD1    | Hs00181217_m1<br>CD4    | Hs00233520_m1<br>CD8A  | Hs01125301_m1<br>CD274  | Hs99999043_m1<br>TNF   | Hs00401201_m1<br>IDO2  |
| G | Hs00391287_m1<br>ICOSLG   | Hs00194957_m1<br>EBI3   | Hs00174379_m1<br>IL13  | Hs00958618_m1<br>HAVCR2 | Hs00332759_m1<br>IL23R | Hs01011591_m1<br>CTLA4 | Hs00391287_m1<br>ICOSLG   | Hs00194957_m1<br>EBI3   | Hs00174379_m1<br>IL13  | Hs00958618_m1<br>HAVCR2 | Hs00332759_m1<br>IL23R | Hs01011591_m1<br>CTLA4 |
| H | Hs04189704_m1<br>PTPRC    | Hs00155485_m1<br>IL10RA | Hs00180031_m1<br>IRF4  | Hs00168405_m1<br>IL12A  | Hs00188051_m1<br>GZMB  | Hs00900058_m1<br>VEGFA | Hs04189704_m1<br>PTPRC    | Hs00155485_m1<br>IL10RA | Hs00180031_m1<br>IRF4  | Hs00168405_m1<br>IL12A  | Hs00188051_m1<br>GZMB  | Hs00900058_m1<br>VEGFA |

**B. taqman IR gene expression assays used for cell sorted CD8+ TIL**

|   | 1                         | 2                       | 3                         | 4                        | 5                       | 6                      | 7                       | 8                       | 9                        | 10                       | 11                       | 12                        |
|---|---------------------------|-------------------------|---------------------------|--------------------------|-------------------------|------------------------|-------------------------|-------------------------|--------------------------|--------------------------|--------------------------|---------------------------|
| A | Hs99999901_s1<br>18s rRNA | Hs99999919_m1<br>CCR4   | Hs01013469_m1<br>CCR7     | Hs00386811_m1<br>CD27    | Hs01007422_m1<br>CD28   | Hs01002913_g1<br>CD40  | Hs00961622_m1<br>IL10   | Hs00155485_m1<br>IL10RA | Hs00989291_m1<br>IFNG    | Hs00902334_m1<br>IL7R    | Hs01081697_m1<br>IL2RB   | Hs00907779_m1<br>IL2RA    |
| B | Hs00174114_m1<br>IL2      | Hs00174383_m1<br>IL17A  | Hs01003716_m1<br>IL15     | Hs03044418_m1<br>CTLA4   | Hs01550088_m1<br>PDCD1  | Hs00158563_m1<br>LAG3  | Hs00958618_m1<br>HAVCR2 | Hs00359999_m1<br>ICOS   | Hs00155512_m1<br>TNFRSF9 | Hs00921974_m1<br>TNFSF10 | Hs00542477_m1<br>TNFSF14 | Hs00998604_m1<br>TNFRSF14 |
| C | Hs00174277_m1<br>TNFRSF8  | Hs00174286_m1<br>TNFSF8 | Hs00188346_m1<br>TNFRSF18 | Hs00937194_g1<br>TNFRSF4 | Hs00699198_m1<br>BTLA   | Hs00203436_m1<br>TBX21 | Hs01076122_m1<br>RORC   | Hs00172872_m1<br>EOMES  | Hs00231122_m1<br>GATA3   | Hs01056533_m1<br>IRF4    | Hs00180288_m1<br>CBLB    | Hs00166165_m1<br>EGR2     |
| D | Hs01548894_m1<br>CDK2     | Hs01565883_g1<br>CDK4   | Hs00176278_m1<br>DGKA     | Hs01632414_s1<br>DGKZ    | Hs00231780_m1<br>EGR3   | Hs00236330_m1<br>FAS   | Hs00174877_m1<br>LEP    | Hs00173587_m1<br>LGALS3 | Hs04188773_g1<br>LTA     | Hs00542678_m1<br>NFATC1  | Hs00905451_m1<br>NFATC2  | Hs00190046_m1<br>NFATC3   |
| E | Hs00402870_m1<br>HDAC9    | Hs00169473_m1<br>PRF1   | Hs01554355_m1<br>GZMB     | Hs00174151_m1<br>SELL    | Hs00226053_m1<br>RNF128 | Hs00181225_m1<br>FASLG | Hs01062014_m1<br>NOTCH1 | Hs00959886_g1<br>PTPN2  | Hs00396777_m1<br>PPP2R2D | Hs01088027_g1<br>ING4    | Hs00395201_m1<br>ITCH    | Hs00235006_m1<br>ITGA1    |
| F | Hs00869394_s1<br>ARHGAP5  | Hs01058318_m1<br>ALK    | Hs03986111_s1<br>TOB1     | Hs00269995_m1<br>DTX1    | Hs00171072_m1<br>CCL1   | Hs00213192_m1<br>NRN1  | Hs01103582_s1<br>JUN    | Hs01083836_m1<br>BCL2L1 | Hs01113624_g1<br>TNF     | Hs00219575_m1<br>HLA-DRA | Hs00751481_s1<br>XCL1    | Hs00175568_m1<br>CD244    |
| G | Hs00705164_s1<br>SOCS1    | Hs00219699_m1<br>CRTAM  | Hs00199894_m1<br>CD160    | Hs00929964_m1<br>KLRG1   | Hs04183523_m1<br>PTGER2 | Hs00963707_g1<br>GRN   | Hs00246266_m1<br>GNLY   | Hs00757930_m1<br>CXCL13 | Hs00215132_m1<br>LYAR    | Hs01555214_g1<br>TXN     | Hs02330328_s1<br>SOCS3   | Hs00183425_m1<br>SMAD2    |
| H | Hs01091226_g1<br>DUSP2    | Hs00996325_g1<br>KDM6B  | Hs00153451_m1<br>E2F1     | Hs00231667_m1<br>E2F2    | Hs00939627_m1<br>GUSB   | Hs02758991_g1<br>GAPDH | Hs02800695_m1<br>HPRT1  | Hs00892674_m1<br>RGS16  | Hs01547250_m1<br>LEF1    | Hs01065372_g1<br>LAT     | Hs01058407_m1<br>CD4     | Hs00233520_m1<br>CD8A     |

**Table S4.** Summary statistics of Immune Related gene expression between Responder (R) and Non-Responder (NR) mCRC treated with pembrolizumab, sorted by Wilcoxon-Mann Whitney p-values (Median).

|                 | All Patients<br>N = 19 | Nonresponder<br>N = 13 | Responder<br>N = 6   | P-Value*          |
|-----------------|------------------------|------------------------|----------------------|-------------------|
| <b>RORC</b>     |                        |                        |                      |                   |
| Mean (SD)       | 0 (3.16)               | -1.68 (1.57)           | 3.64 (2.6)           | 0.003             |
| Median (Range)  | -0.6 (-4.16, 6.28)     | -0.86 (-4.16, 0.81)    | 3.84 (-0.47, 6.28)   | <b>&lt; 0.001</b> |
| No. Missing (%) | 0 (0)                  | 0 (0)                  | 0 (0)                |                   |
| <b>IL23R</b>    |                        |                        |                      |                   |
| Mean (SD)       | 0 (2.84)               | -1.07 (2.8)            | 2.31 (0.98)          | 0.001             |
| Median (Range)  | -0.2 (-5.23, 6.56)     | -1.63 (-5.23, 6.56)    | 2.14 (1.31, 3.94)    | <b>0.002</b>      |
| No. Missing (%) | 0 (0)                  | 0 (0)                  | 0 (0)                |                   |
| <b>LAG3</b>     |                        |                        |                      |                   |
| Mean (SD)       | 0 (1.82)               | 0.76 (1.43)            | -1.65 (1.51)         | 0.009             |
| Median (Range)  | 0.3 (-3.76, 3.93)      | 0.51 (-2.14, 3.93)     | -1.43 (-3.76, 0.26)  | <b>0.003</b>      |
| No. Missing (%) | 0 (0)                  | 0 (0)                  | 0 (0)                |                   |
| <b>IDO1</b>     |                        |                        |                      |                   |
| Mean (SD)       | 0 (4.68)               | 1.77 (4.4)             | -3.84 (2.58)         | 0.003             |
| Median (Range)  | -1.4 (-7.34, 9.47)     | -0.16 (-3.36, 9.47)    | -3.25 (-7.34, -1.43) | <b>0.009</b>      |
| No. Missing (%) | 0 (0)                  | 0 (0)                  | 0 (0)                |                   |
| <b>CD4</b>      |                        |                        |                      |                   |
| Mean (SD)       | 0 (1.17)               | 0.38 (1.13)            | -0.83 (0.79)         | 0.017             |
| Median (Range)  | -0.2 (-1.52, 2.9)      | 0.02 (-1.1, 2.9)       | -0.97 (-1.52, 0.64)  | <b>0.017</b>      |
| No. Missing (%) | 0 (0)                  | 0 (0)                  | 0 (0)                |                   |
| <b>CD274</b>    |                        |                        |                      |                   |
| Mean (SD)       | 0 (4.06)               | 1.27 (4.28)            | -2.74 (1.44)         | 0.008             |
| Median (Range)  | -1.2 (-4.9, 9.79)      | 0.05 (-3.63, 9.79)     | -2.48 (-4.9, -1.24)  | <b>0.02</b>       |
| No. Missing (%) | 0 (0)                  | 0 (0)                  | 0 (0)                |                   |
| <b>ICOSLG</b>   |                        |                        |                      |                   |
| Mean (SD)       | 0 (1.41)               | -0.3 (1.56)            | 0.66 (0.78)          | 0.093             |
| Median (Range)  | 0 (-2.33, 4.12)        | -0.27 (-2.33, 4.12)    | 0.37 (-0.03, 1.73)   | <b>0.029</b>      |
| No. Missing (%) | 0 (0)                  | 0 (0)                  | 0 (0)                |                   |
| <b>VEGFA</b>    |                        |                        |                      |                   |
| Mean (SD)       | 0 (1)                  | -0.33 (0.98)           | 0.71 (0.66)          | 0.017             |
| Median (Range)  | 0 (-1.72, 1.8)         | -0.21 (-1.72, 1.09)    | 0.61 (-0.06, 1.8)    | <b>0.046</b>      |
| No. Missing (%) | 0 (0)                  | 0 (0)                  | 0 (0)                |                   |
| <b>CD8A</b>     |                        |                        |                      |                   |
| Mean (SD)       | 0 (1.9)                | 0.61 (1.62)            | -1.32 (1.89)         | 0.06              |

|                 |                    |                     |                     |              |
|-----------------|--------------------|---------------------|---------------------|--------------|
| Median (Range)  | -0.1 (-4.15, 3.08) | 0.36 (-1.77, 3.08)  | -1.31 (-4.15, 1.28) | <b>0.058</b> |
| No. Missing (%) | 0 (0)              | 0 (0)               | 0 (0)               |              |
| <b>MMP9</b>     |                    |                     |                     |              |
| Mean (SD)       | 0 (1.65)           | 0.43 (1.79)         | -0.94 (0.74)        | 0.031        |
| Median (Range)  | -0.5 (-1.71, 4.03) | -0.28 (-1.64, 4.03) | -1.13 (-1.71, 0.43) | <b>0.058</b> |
| No. Missing (%) | 0 (0)              | 0 (0)               | 0 (0)               |              |
| <b>CTLA4</b>    |                    |                     |                     |              |
| Mean (SD)       | 0 (1.69)           | 0.43 (1.68)         | -0.93 (1.41)        | 0.094        |
| Median (Range)  | -0.2 (-2.58, 3.47) | -0.13 (-1.75, 3.47) | -1.35 (-2.58, 1.23) | <b>0.106</b> |
| No. Missing (%) | 0 (0)              | 0 (0)               | 0 (0)               |              |
| <b>TNF</b>      |                    |                     |                     |              |
| Mean (SD)       | 0 (2.61)           | 0.52 (2.92)         | -1.12 (1.34)        | 0.112        |
| Median (Range)  | -0.7 (-2.48, 9.32) | -0.41 (-1.76, 9.32) | -1.46 (-2.48, 0.67) | <b>0.127</b> |
| No. Missing (%) | 0 (0)              | 0 (0)               | 0 (0)               |              |
| <b>IKZF4</b>    |                    |                     |                     |              |
| Mean (SD)       | 0 (0.95)           | -0.17 (0.88)        | 0.36 (1.07)         | 0.319        |
| Median (Range)  | -0.2 (-1.35, 1.78) | -0.45 (-1.35, 1.78) | 0.33 (-1.34, 1.73)  | <b>0.152</b> |
| No. Missing (%) | 0 (0)              | 0 (0)               | 0 (0)               |              |
| <b>IL10</b>     |                    |                     |                     |              |
| Mean (SD)       | 0 (3.13)           | 0.5 (3.09)          | -1.08 (3.21)        | 0.34         |
| Median (Range)  | -1 (-3.87, 7.25)   | -0.8 (-2.2, 7.25)   | -2.12 (-3.87, 4.98) | <b>0.152</b> |
| No. Missing (%) | 0 (0)              | 0 (0)               | 0 (0)               |              |
| <b>PDCD1</b>    |                    |                     |                     |              |
| Mean (SD)       | 0 (4.21)           | 0.82 (4.28)         | -1.77 (3.78)        | 0.21         |
| Median (Range)  | -1 (-5.88, 7.22)   | -0.88 (-4.11, 7.22) | -2.95 (-5.88, 4.95) | <b>0.152</b> |
| No. Missing (%) | 0 (0)              | 0 (0)               | 0 (0)               |              |
| <b>IRF4</b>     |                    |                     |                     |              |
| Mean (SD)       | 0 (1.79)           | 0.36 (1.6)          | -0.78 (2.08)        | 0.269        |
| Median (Range)  | -0.2 (-2.92, 3.22) | 0.14 (-2.24, 3.22)  | -1.46 (-2.92, 2.88) | <b>0.179</b> |
| No. Missing (%) | 0 (0)              | 0 (0)               | 0 (0)               |              |
| <b>TNFSF4</b>   |                    |                     |                     |              |
| Mean (SD)       | 0 (4.58)           | -0.3 (5.48)         | 0.65 (1.63)         | 0.573        |
| Median (Range)  | -1.1 (-5.44, 11.2) | -1.68 (-5.44, 11.2) | 0.8 (-1.12, 2.44)   | <b>0.179</b> |
| No. Missing (%) | 0 (0)              | 0 (0)               | 0 (0)               |              |
| <b>IL6</b>      |                    |                     |                     |              |
| Mean (SD)       | 0 (4.6)            | 0.87 (4.61)         | -1.88 (4.33)        | 0.236        |
| Median (Range)  | 1.4 (-7.25, 5.85)  | 3.15 (-7.25, 5.85)  | -2.51 (-6.24, 4.46) | <b>0.203</b> |
| No. Missing (%) | 0 (0)              | 0 (0)               | 0 (0)               |              |



|                 |                     |                      |                     |              |
|-----------------|---------------------|----------------------|---------------------|--------------|
| <b>PRF1</b>     |                     |                      |                     |              |
| Mean (SD)       | 0 (3.98)            | 0.9 (4.38)           | -1.94 (2.06)        | 0.072        |
| Median (Range)  | -0.6 (-5.55, 10.53) | -0.58 (-2.98, 10.53) | -1.55 (-5.55, 0.33) | <b>0.21</b>  |
| No. Missing (%) | 0 (0)               | 0 (0)                | 0 (0)               |              |
| <b>IL23A</b>    |                     |                      |                     |              |
| Mean (SD)       | 0 (4.16)            | -0.5 (4.32)          | 1.07 (3.93)         | 0.45         |
| Median (Range)  | -2.2 (-4.35, 8.42)  | -2.31 (-4.35, 8.42)  | 0.25 (-2.66, 7.03)  | <b>0.282</b> |
| No. Missing (%) | 0 (0)               | 0 (0)                | 0 (0)               |              |
| <b>IDO2</b>     |                     |                      |                     |              |
| Mean (SD)       | 0 (3.96)            | 0.77 (4.35)          | -1.68 (2.46)        | 0.138        |
| Median (Range)  | -1.2 (-5.31, 7.36)  | 3.06 (-5.31, 7.36)   | -1.61 (-4.76, 1.93) | <b>0.323</b> |
| No. Missing (%) | 0 (0)               | 0 (0)                | 0 (0)               |              |
| <b>PTGS2</b>    |                     |                      |                     |              |
| Mean (SD)       | 0 (3.17)            | 0.55 (3.38)          | -1.2 (2.5)          | 0.228        |
| Median (Range)  | -0.5 (-4.79, 10.38) | -0.48 (-2.75, 10.38) | -0.86 (-4.79, 1.77) | <b>0.368</b> |
| No. Missing (%) | 0 (0)               | 0 (0)                | 0 (0)               |              |
| <b>IL17A</b>    |                     |                      |                     |              |
| Mean (SD)       | 0 (4.55)            | 0.64 (4.86)          | -1.39 (3.82)        | 0.344        |
| Median (Range)  | -1.3 (-6.25, 7.02)  | 3.37 (-5.54, 7.02)   | -1.46 (-6.25, 4.01) | <b>0.416</b> |
| No. Missing (%) | 0 (0)               | 0 (0)                | 0 (0)               |              |
| <b>IL22</b>     |                     |                      |                     |              |
| Mean (SD)       | 0 (2.79)            | 0.46 (2.61)          | -0.99 (3.16)        | 0.355        |
| Median (Range)  | 0.5 (-7.22, 3.49)   | 0.55 (-7.22, 3.49)   | -0.73 (-5.08, 3.22) | <b>0.456</b> |
| No. Missing (%) | 0 (0)               | 0 (0)                | 0 (0)               |              |
| <b>ARG1</b>     |                     |                      |                     |              |
| Mean (SD)       | 0 (4.64)            | 0.8 (3.99)           | -1.74 (5.84)        | 0.365        |
| Median (Range)  | 2.3 (-8.88, 5.46)   | 2.54 (-6.87, 4.75)   | -1.96 (-8.88, 5.46) | <b>0.51</b>  |
| No. Missing (%) | 0 (0)               | 0 (0)                | 0 (0)               |              |
| <b>IL13</b>     |                     |                      |                     |              |
| Mean (SD)       | 0 (3.41)            | 0.57 (2.94)          | -1.23 (4.32)        | 0.386        |
| Median (Range)  | 1.1 (-7.19, 4.09)   | 1.15 (-6.33, 4.09)   | -0.13 (-7.19, 3.82) | <b>0.51</b>  |
| No. Missing (%) | 0 (0)               | 0 (0)                | 0 (0)               |              |
| <b>GZMB</b>     |                     |                      |                     |              |
| Mean (SD)       | 0 (4.07)            | 0.39 (4.1)           | -0.85 (4.25)        | 0.565        |
| Median (Range)  | -0.6 (-5.8, 8.8)    | -0.56 (-4.07, 8.8)   | -1 (-5.8, 6.05)     | <b>0.521</b> |
| No. Missing (%) | 0 (0)               | 0 (0)                | 0 (0)               |              |
| <b>IL10RA</b>   |                     |                      |                     |              |

|                 |                     |                      |                     |              |
|-----------------|---------------------|----------------------|---------------------|--------------|
| Mean (SD)       | 0 (1.32)            | 0.13 (1.43)          | -0.29 (1.13)        | 0.504        |
| Median (Range)  | -0.3 (-1.65, 3.28)  | -0.25 (-1.65, 3.28)  | -0.55 (-1.32, 1.87) | <b>0.521</b> |
| No. Missing (%) | 0 (0)               | 0 (0)                | 0 (0)               |              |
| <b>IL21</b>     |                     |                      |                     |              |
| Mean (SD)       | 0 (2.85)            | 0.75 (1.54)          | -1.62 (4.36)        | 0.248        |
| Median (Range)  | 0.7 (-6.94, 3.37)   | 0.69 (-2.38, 3.37)   | -0.51 (-6.94, 3.1)  | <b>0.568</b> |
| No. Missing (%) | 0 (0)               | 0 (0)                | 0 (0)               |              |
| <b>FOXP3</b>    |                     |                      |                     |              |
| Mean (SD)       | 0 (3.71)            | -0.23 (3.72)         | 0.49 (4)            | 0.718        |
| Median (Range)  | -1 (-3.12, 10.34)   | -1.01 (-3.11, 10.34) | -0.9 (-3.12, 8.07)  | <b>0.639</b> |
| No. Missing (%) | 0 (0)               | 0 (0)                | 0 (0)               |              |
| <b>IL1B</b>     |                     |                      |                     |              |
| Mean (SD)       | 0 (3.46)            | 0.38 (4.01)          | -0.83 (1.86)        | 0.379        |
| Median (Range)  | -0.6 (-4.49, 12.27) | -0.47 (-4.49, 12.27) | -0.95 (-3.14, 1.42) | <b>0.639</b> |
| No. Missing (%) | 0 (0)               | 0 (0)                | 0 (0)               |              |
| <b>NOS2</b>     |                     |                      |                     |              |
| Mean (SD)       | 0 (2.08)            | 0.24 (2.03)          | -0.53 (2.27)        | 0.498        |
| Median (Range)  | -0.2 (-3.33, 4.87)  | -0.16 (-2.56, 4.87)  | -0.58 (-3.33, 2.01) | <b>0.639</b> |
| No. Missing (%) | 0 (0)               | 0 (0)                | 0 (0)               |              |
| <b>IFNG</b>     |                     |                      |                     |              |
| Mean (SD)       | 0 (5.2)             | 0.32 (5.47)          | -0.7 (4.98)         | 0.693        |
| Median (Range)  | -2.4 (-6.65, 8.16)  | -2.39 (-6.14, 8.16)  | -1.21 (-6.65, 6.09) | <b>0.701</b> |
| No. Missing (%) | 0 (0)               | 0 (0)                | 0 (0)               |              |
| <b>EBI3</b>     |                     |                      |                     |              |
| Mean (SD)       | 0 (3.43)            | 0.05 (3.39)          | -0.11 (3.84)        | 0.935        |
| Median (Range)  | -0.9 (-3.47, 6.98)  | -0.87 (-3.29, 6.84)  | -0.69 (-3.47, 6.98) | <b>0.765</b> |
| No. Missing (%) | 0 (0)               | 0 (0)                | 0 (0)               |              |
| <b>TGFB1</b>    |                     |                      |                     |              |
| Mean (SD)       | 0 (1.18)            | 0.1 (1.3)            | -0.21 (0.91)        | 0.554        |
| Median (Range)  | -0.1 (-1.44, 3.32)  | -0.1 (-1.44, 3.32)   | -0.37 (-1.19, 0.99) | <b>0.765</b> |
| No. Missing (%) | 0 (0)               | 0 (0)                | 0 (0)               |              |
| <b>CSF1R</b>    |                     |                      |                     |              |
| Mean (SD)       | 0 (1.48)            | -0.02 (1.65)         | 0.03 (1.19)         | 0.941        |
| Median (Range)  | -0.3 (-2.65, 3.87)  | -0.49 (-2.65, 3.87)  | -0.18 (-1.09, 2.09) | <b>0.831</b> |
| No. Missing (%) | 0 (0)               | 0 (0)                | 0 (0)               |              |
| <b>GATA3</b>    |                     |                      |                     |              |
| Mean (SD)       | 0 (1.82)            | -0.11 (1.64)         | 0.23 (2.31)         | 0.758        |

|                 |                     |                     |                      |                 |
|-----------------|---------------------|---------------------|----------------------|-----------------|
| Median (Range)  | -0.4 (-1.96, 4.03)  | -0.18 (-1.96, 3.12) | -0.85 (-1.74, 4.03)  | <b>0.831</b>    |
| No. Missing (%) | 0 (0)               | 0 (0)               | 0 (0)                |                 |
| <b>HIF1A</b>    |                     |                     |                      |                 |
| Mean (SD)       | 0 (0.88)            | 0.05 (0.96)         | -0.11 (0.76)         | 0.707           |
| Median (Range)  | -0.1 (-1.23, 1.68)  | -0.09 (-1.23, 1.68) | -0.02 (-1.21, 1)     | <b>0.966</b>    |
| No. Missing (%) | 0 (0)               | 0 (0)               | 0 (0)                |                 |
| <b>IKZF2</b>    |                     |                     |                      |                 |
| Mean (SD)       | 0 (0.89)            | -0.06 (0.77)        | 0.12 (1.17)          | 0.746           |
| Median (Range)  | 0 (-1.15, 2.26)     | 0.03 (-1.1, 1.81)   | -0.09 (-1.15, 2.26)  | <b>0.966</b>    |
| No. Missing (%) | 0 (0)               | 0 (0)               | 0 (0)                |                 |
| <b>IL12A</b>    |                     |                     |                      |                 |
| Mean (SD)       | 0 (2.84)            | -0.13 (2.81)        | 0.29 (3.16)          | 0.787           |
| Median (Range)  | -0.3 (-3.24, 7.16)  | -0.33 (-3.24, 7.16) | -0.37 (-2.61, 5.76)  | <b>&gt;0.99</b> |
| No. Missing (%) | 0 (0)               | 0 (0)               | 0 (0)                |                 |
| <b>IL18</b>     |                     |                     |                      |                 |
| Mean (SD)       | 0 (1.27)            | 0.02 (1.52)         | -0.05 (0.53)         | 0.889           |
| Median (Range)  | -0.2 (-3.71, 2.12)  | -0.04 (-3.71, 2.12) | -0.25 (-0.56, 0.87)  | <b>&gt;0.99</b> |
| No. Missing (%) | 0 (0)               | 0 (0)               | 0 (0)                |                 |
| <b>TBX21</b>    |                     |                     |                      |                 |
| Mean (SD)       | 0 (4.73)            | 0.09 (4.47)         | -0.2 (5.69)          | 0.915           |
| Median (Range)  | -2.5 (-4.24, 11.27) | -2.56 (-4.24, 8.52) | -2.44 (-3.73, 11.27) | <b>&gt;0.99</b> |
| No. Missing (%) | 0 (0)               | 0 (0)               | 0 (0)                |                 |

\*P-value based on t-test and Wilcoxon-Mann Whitney test

**Table S5.** Significant p values ( $p < 0.05$ ) of gene expression between newly defined R-type and NR-type MMRp CRC specimens.

| Non-parametric multiple t-test primary R- versus NR-type MMRp CRC <sup>a</sup> |             |                   |                     |            |                  |         |    |
|--------------------------------------------------------------------------------|-------------|-------------------|---------------------|------------|------------------|---------|----|
| Genes                                                                          | P value     | Mean R MMRp (n=3) | Mean NR MMRp (n=11) | Difference | SE of difference | t ratio | df |
| <i>LAG3</i>                                                                    | 0.00013952  | 0.0524318         | 0.00836918          | 0.0440626  | 0.00803292       | 5.48526 | 12 |
| <i>CD8A</i>                                                                    | 0.000306537 | 1.37435           | 0.148175            | 1.22618    | 0.244972         | 5.00538 | 12 |
| <i>PTPRC</i>                                                                   | 0.000591193 | 8.63849           | 1.44078             | 7.19771    | 1.31474          | 5.47464 | 8  |
| <i>FOXP3</i>                                                                   | 0.000880331 | 0.0986468         | 0.0225226           | 0.0761241  | 0.0173394        | 4.39024 | 12 |
| <i>CD274</i>                                                                   | 0.00169571  | 0.0191249         | 0.00478136          | 0.0143435  | 0.00356695       | 4.02123 | 12 |
| <i>CTLA4</i>                                                                   | 0.00462478  | 0.375785          | 0.0633476           | 0.312438   | 0.0900208        | 3.47072 | 12 |
| <i>CD4</i>                                                                     | 0.00761172  | 2.09297           | 0.368644            | 1.72433    | 0.538604         | 3.20147 | 12 |
| <i>IRF4</i>                                                                    | 0.00847909  | 0.129499          | 0.0239186           | 0.10558    | 0.0335884        | 3.14334 | 12 |
| <i>IL10RA</i>                                                                  | 0.00860155  | 1.12714           | 0.302912            | 0.824224   | 0.262858         | 3.13562 | 12 |
| <i>GATA3</i>                                                                   | 0.0202629   | 0.122791          | 0.0365723           | 0.0862189  | 0.0322442        | 2.67393 | 12 |
| <i>IDO1</i>                                                                    | 0.0219489   | 0.22015           | 0.00997234          | 0.210178   | 0.0798955        | 2.63066 | 12 |
| <i>IKZF2</i>                                                                   | 0.0232372   | 0.107724          | 0.0257105           | 0.0820137  | 0.0315469        | 2.59974 | 12 |
| <i>PRF1</i>                                                                    | 0.0277546   | 0.0998818         | 0.0205513           | 0.0793305  | 0.0316923        | 2.50315 | 12 |
| <i>HIF1A</i>                                                                   | 0.0432477   | 5.39949           | 2.01431             | 3.38519    | 1.49818          | 2.25953 | 12 |
| <i>EBI3</i>                                                                    | 0.0440331   | 0.0101568         | 0.00325257          | 0.00690419 | 0.00306915       | 2.24955 | 12 |
| <i>TGFB1</i>                                                                   | 0.0483204   | 1.22629           | 0.374702            | 0.851589   | 0.38746          | 2.19788 | 12 |

<sup>a</sup> no correction for multiple comparisons

■ T cell checkpoints; ■ T cell infiltration; ■ T reg

**Table S6.** Summary statistics for paired differences of gene expression between cell sorted CD8<sup>+</sup> PD1<sup>hi</sup> and CD8<sup>+</sup> PD1<sup>lo</sup> TILs of resected primary CRC. Gene expression in PD1<sup>hi</sup> and PD1<sup>lo</sup> were relative to expression in PD1<sup>neg</sup> CD8<sup>+</sup> TILs ( $\Delta\Delta Ct$ ).

|                 | PD1 Low - PD1 High<br>N = 6 | P-<br>Value*    |
|-----------------|-----------------------------|-----------------|
| <b>ARHGAP5</b>  |                             |                 |
| Mean (SD)       | 0.87 (1.31)                 | 0.164           |
| Median (Range)  | 0.5 (-0.75, 2.7)            | <b>0.219</b>    |
| No. Missing (%) | 0 (0)                       |                 |
| <b>BCL2L11</b>  |                             |                 |
| Mean (SD)       | 0.28 (1.02)                 | 0.531           |
| Median (Range)  | -0.1 (-0.57, 2.27)          | <b>&gt;0.99</b> |
| No. Missing (%) | 0 (0)                       |                 |
| <b>BTLA</b>     |                             |                 |
| Mean (SD)       | -21.56 (51.94)              | 0.356           |
| Median (Range)  | -0.4 (-127.58, 0.4)         | <b>0.438</b>    |
| No. Missing (%) | 0 (0)                       |                 |
| <b>CBLB</b>     |                             |                 |
| Mean (SD)       | 0.04 (0.37)                 | 0.8             |
| Median (Range)  | 0.2 (-0.51, 0.46)           | <b>&gt;0.99</b> |
| No. Missing (%) | 0 (0)                       |                 |
| <b>CCR4</b>     |                             |                 |
| Mean (SD)       | -0.64 (1.17)                | 0.236           |
| Median (Range)  | -0.4 (-2.41, 0.53)          | <b>0.438</b>    |
| No. Missing (%) | 0 (0)                       |                 |
| <b>CCR7</b>     |                             |                 |
| Mean (SD)       | 0.18 (0.27)                 | 0.16            |
| Median (Range)  | 0.1 (-0.08, 0.69)           | <b>0.156</b>    |
| No. Missing (%) | 0 (0)                       |                 |
| <b>CD160</b>    |                             |                 |
| Mean (SD)       | 0.14 (0.49)                 | 0.509           |
| Median (Range)  | 0 (-0.37, 1.03)             | <b>&gt;0.99</b> |
| No. Missing (%) | 0 (0)                       |                 |
| <b>CD244</b>    |                             |                 |
| Mean (SD)       | -0.58 (1.3)                 | 0.321           |
| Median (Range)  | -0.2 (-2.49, 0.75)          | <b>0.563</b>    |
| No. Missing (%) | 0 (0)                       |                 |

|                 |                           |                 |
|-----------------|---------------------------|-----------------|
| <b>CD27</b>     |                           |                 |
| Mean (SD)       | -1.79 (2.81)              | 0.179           |
| Median (Range)  | -0.8 (-6.18, 0.98)        | <b>0.438</b>    |
| No. Missing (%) | 0 (0)                     |                 |
| <b>CD28</b>     |                           |                 |
| Mean (SD)       | -0.26 (1.02)              | 0.563           |
| Median (Range)  | 0.2 (-1.62, 0.72)         | <b>&gt;0.99</b> |
| No. Missing (%) | 0 (0)                     |                 |
| <b>CD8A</b>     |                           |                 |
| Mean (SD)       | 0.03 (0.3)                | 0.794           |
| Median (Range)  | 0 (-0.36, 0.57)           | <b>&gt;0.99</b> |
| No. Missing (%) | 0 (0)                     |                 |
| <b>CDK2</b>     |                           |                 |
| Mean (SD)       | -0.06 (0.69)              | 0.827           |
| Median (Range)  | -0.2 (-0.69, 1.27)        | <b>0.438</b>    |
| No. Missing (%) | 0 (0)                     |                 |
| <b>CDK4</b>     |                           |                 |
| Mean (SD)       | -0.28 (0.52)              | 0.25            |
| Median (Range)  | -0.4 (-0.84, 0.66)        | <b>0.313</b>    |
| No. Missing (%) | 0 (0)                     |                 |
| <b>CRTAM</b>    |                           |                 |
| Mean (SD)       | -0.26 (1.26)              | 0.64            |
| Median (Range)  | -0.7 (-1.3, 2.14)         | <b>0.438</b>    |
| No. Missing (%) | 0 (0)                     |                 |
| <b>CTLA4</b>    |                           |                 |
| Mean (SD)       | -15.89 (34.77)            | 0.314           |
| Median (Range)  | -2.2 (-86.78, 0.54)       | <b>0.094</b>    |
| No. Missing (%) | 0 (0)                     |                 |
| <b>CXCL13</b>   |                           |                 |
| Mean (SD)       | -35405.57 (76899.48)      | 0.311           |
| Median (Range)  | -838.8 (-191625.87, -0.3) | <b>0.031</b>    |
| No. Missing (%) | 0 (0)                     |                 |
| <b>DGKA</b>     |                           |                 |
| Mean (SD)       | -0.08 (0.51)              | 0.715           |
| Median (Range)  | 0 (-0.77, 0.59)           | <b>&gt;0.99</b> |
| No. Missing (%) | 0 (0)                     |                 |
| <b>DGKZ</b>     |                           |                 |
| Mean (SD)       | -0.38 (0.71)              | 0.25            |

|                 |                        |              |
|-----------------|------------------------|--------------|
| Median (Range)  | -0.4 (-1.45, 0.64)     | <b>0.438</b> |
| No. Missing (%) | 0 (0)                  |              |
| <b>DTX1</b>     |                        |              |
| Mean (SD)       | 0.11 (0.42)            | 0.547        |
| Median (Range)  | 0 (-0.41, 0.71)        | <b>0.688</b> |
| No. Missing (%) | 0 (0)                  |              |
| <b>DUSP2</b>    |                        |              |
| Mean (SD)       | 0.09 (0.45)            | 0.651        |
| Median (Range)  | 0.2 (-0.73, 0.51)      | <b>0.563</b> |
| No. Missing (%) | 0 (0)                  |              |
| <b>E2F1</b>     |                        |              |
| Mean (SD)       | -1.02 (1.32)           | 0.118        |
| Median (Range)  | -0.8 (-3.35, 0.53)     | <b>0.094</b> |
| No. Missing (%) | 0 (0)                  |              |
| <b>E2F2</b>     |                        |              |
| Mean (SD)       | -240.24 (637.01)       | 0.398        |
| Median (Range)  | -0.3 (-1537.94, 99.65) | <b>0.59</b>  |
| No. Missing (%) | 0 (0)                  |              |
| <b>EGR2</b>     |                        |              |
| Mean (SD)       | 0.18 (0.55)            | 0.454        |
| Median (Range)  | 0.2 (-0.56, 0.91)      | <b>0.563</b> |
| No. Missing (%) | 0 (0)                  |              |
| <b>EGR3</b>     |                        |              |
| Mean (SD)       | 0.35 (0.38)            | 0.074        |
| Median (Range)  | 0.2 (0, 0.88)          | <b>0.063</b> |
| No. Missing (%) | 0 (0)                  |              |
| <b>EOMES</b>    |                        |              |
| Mean (SD)       | -4.97 (12.31)          | 0.368        |
| Median (Range)  | -0.5 (-29.72, 3.7)     | <b>0.438</b> |
| No. Missing (%) | 0 (0)                  |              |
| <b>FAS</b>      |                        |              |
| Mean (SD)       | 0.15 (0.71)            | 0.633        |
| Median (Range)  | 0.1 (-0.67, 1.42)      | <b>0.688</b> |
| No. Missing (%) | 0 (0)                  |              |
| <b>FASLG</b>    |                        |              |
| Mean (SD)       | -0.83 (1.14)           | 0.133        |
| Median (Range)  | -0.4 (-2.96, 0.18)     | <b>0.094</b> |
| No. Missing (%) | 0 (0)                  |              |

|                 |                     |                 |
|-----------------|---------------------|-----------------|
| <b>GATA3</b>    |                     |                 |
| Mean (SD)       | 0.12 (0.31)         | 0.373           |
| Median (Range)  | 0.2 (-0.24, 0.59)   | <b>0.563</b>    |
| No. Missing (%) | 0 (0)               |                 |
| <b>GNLY</b>     |                     |                 |
| Mean (SD)       | -0.09 (0.59)        | 0.736           |
| Median (Range)  | 0.1 (-0.96, 0.69)   | <b>&gt;0.99</b> |
| No. Missing (%) | 0 (0)               |                 |
| <b>GRN</b>      |                     |                 |
| Mean (SD)       | -1.13 (2.32)        | 0.285           |
| Median (Range)  | -0.4 (-5.79, 0.32)  | <b>0.156</b>    |
| No. Missing (%) | 0 (0)               |                 |
| <b>GZMB</b>     |                     |                 |
| Mean (SD)       | -1.43 (0.85)        | 0.009           |
| Median (Range)  | -1.6 (-2.35, -0.37) | <b>0.031</b>    |
| No. Missing (%) | 0 (0)               |                 |
| <b>HAVCR2</b>   |                     |                 |
| Mean (SD)       | -4.28 (6.76)        | 0.182           |
| Median (Range)  | -2.3 (-14.11, 3.46) | <b>0.219</b>    |
| No. Missing (%) | 0 (0)               |                 |
| <b>HDAC9</b>    |                     |                 |
| Mean (SD)       | -5.55 (38.04)       | 0.735           |
| Median (Range)  | 0.2 (-75.42, 41.61) | <b>&gt;0.99</b> |
| No. Missing (%) | 0 (0)               |                 |
| <b>HLA-DRA</b>  |                     |                 |
| Mean (SD)       | -2.18 (4.66)        | 0.303           |
| Median (Range)  | -0.5 (-8.32, 3.62)  | <b>0.219</b>    |
| No. Missing (%) | 0 (0)               |                 |
| <b>HPRT1</b>    |                     |                 |
| Mean (SD)       | -0.06 (0.37)        | 0.708           |
| Median (Range)  | -0.1 (-0.6, 0.55)   | <b>0.438</b>    |
| No. Missing (%) | 0 (0)               |                 |
| <b>ICOS</b>     |                     |                 |
| Mean (SD)       | -1.06 (2.08)        | 0.265           |
| Median (Range)  | -0.2 (-4.96, 0.59)  | <b>0.563</b>    |
| No. Missing (%) | 0 (0)               |                 |
| <b>IFNG</b>     |                     |                 |
| Mean (SD)       | -0.24 (0.62)        | 0.387           |
| Median (Range)  | 0 (-1.16, 0.35)     | <b>0.688</b>    |



|                 |                      |                 |
|-----------------|----------------------|-----------------|
| No. Missing (%) | 0 (0)                |                 |
| <b>IL10</b>     |                      |                 |
| Mean (SD)       | -33.18 (60.44)       | 0.237           |
| Median (Range)  | -1.5 (-148.63, 4.11) | <b>0.563</b>    |
| No. Missing (%) | 0 (0)                |                 |
| <b>IL10RA</b>   |                      |                 |
| Mean (SD)       | 0.15 (0.36)          | 0.36            |
| Median (Range)  | 0.1 (-0.29, 0.61)    | <b>0.563</b>    |
| No. Missing (%) | 0 (0)                |                 |
| <b>IL15</b>     |                      |                 |
| Mean (SD)       | 0.1 (0.17)           | 0.223           |
| Median (Range)  | 0.1 (-0.19, 0.3)     | <b>0.219</b>    |
| No. Missing (%) | 0 (0)                |                 |
| <b>IL17A</b>    |                      |                 |
| Mean (SD)       | 1.76 (17.76)         | 0.818           |
| Median (Range)  | -2.3 (-15.22, 36.28) | <b>0.59</b>     |
| No. Missing (%) | 0 (0)                |                 |
| <b>IL2</b>      |                      |                 |
| Mean (SD)       | 0.1 (0.16)           | 0.191           |
| Median (Range)  | 0.1 (-0.05, 0.41)    | <b>0.219</b>    |
| No. Missing (%) | 0 (0)                |                 |
| <b>IL2RA</b>    |                      |                 |
| Mean (SD)       | 0.51 (0.45)          | 0.038           |
| Median (Range)  | 0.5 (-0.07, 1.24)    | <b>0.063</b>    |
| No. Missing (%) | 0 (0)                |                 |
| <b>IL2RB</b>    |                      |                 |
| Mean (SD)       | 0.1 (0.26)           | 0.408           |
| Median (Range)  | 0.1 (-0.28, 0.48)    | <b>0.438</b>    |
| No. Missing (%) | 0 (0)                |                 |
| <b>IL7R</b>     |                      |                 |
| Mean (SD)       | 0.23 (0.33)          | 0.142           |
| Median (Range)  | 0.1 (-0.07, 0.77)    | <b>0.313</b>    |
| No. Missing (%) | 0 (0)                |                 |
| <b>ING4</b>     |                      |                 |
| Mean (SD)       | 0.2 (0.95)           | 0.628           |
| Median (Range)  | -0.1 (-0.6, 1.95)    | <b>&gt;0.99</b> |
| No. Missing (%) | 0 (0)                |                 |
| <b>IRF4</b>     |                      |                 |

|                 |                    |                 |
|-----------------|--------------------|-----------------|
| Mean (SD)       | 0.16 (0.33)        | 0.3             |
| Median (Range)  | 0.2 (-0.36, 0.58)  | <b>0.313</b>    |
| No. Missing (%) | 0 (0)              |                 |
| <b>ITCH</b>     |                    |                 |
| Mean (SD)       | 0 (0.28)           | 0.999           |
| Median (Range)  | 0 (-0.39, 0.29)    | <b>&gt;0.99</b> |
| No. Missing (%) | 0 (0)              |                 |
| <b>ITGA1</b>    |                    |                 |
| Mean (SD)       | 0.15 (0.25)        | 0.183           |
| Median (Range)  | 0.1 (-0.21, 0.45)  | <b>0.219</b>    |
| No. Missing (%) | 0 (0)              |                 |
| <b>JUN</b>      |                    |                 |
| Mean (SD)       | 0.13 (0.31)        | 0.371           |
| Median (Range)  | 0 (-0.15, 0.66)    | <b>0.844</b>    |
| No. Missing (%) | 0 (0)              |                 |
| <b>KDM6B</b>    |                    |                 |
| Mean (SD)       | 0.37 (0.34)        | 0.043           |
| Median (Range)  | 0.3 (0.01, 0.95)   | <b>0.031</b>    |
| No. Missing (%) | 0 (0)              |                 |
| <b>KLRG1</b>    |                    |                 |
| Mean (SD)       | -0.16 (1.3)        | 0.774           |
| Median (Range)  | 0.2 (-2.74, 0.96)  | <b>0.438</b>    |
| No. Missing (%) | 0 (0)              |                 |
| <b>LAG3</b>     |                    |                 |
| Mean (SD)       | -1.04 (1.01)       | 0.054           |
| Median (Range)  | -1.2 (-2.08, 0.59) | <b>0.094</b>    |
| No. Missing (%) | 0 (0)              |                 |
| <b>LAT</b>      |                    |                 |
| Mean (SD)       | -0.26 (0.67)       | 0.393           |
| Median (Range)  | 0 (-1.52, 0.36)    | <b>0.563</b>    |
| No. Missing (%) | 0 (0)              |                 |
| <b>LEF1</b>     |                    |                 |
| Mean (SD)       | 0.11 (0.39)        | 0.511           |
| Median (Range)  | 0.1 (-0.51, 0.67)  | <b>0.313</b>    |
| No. Missing (%) | 0 (0)              |                 |
| <b>LGALS3</b>   |                    |                 |
| Mean (SD)       | 0.02 (0.44)        | 0.898           |
| Median (Range)  | 0.1 (-0.57, 0.7)   | <b>0.844</b>    |
| No. Missing (%) | 0 (0)              |                 |

|                 |                      |                 |
|-----------------|----------------------|-----------------|
| <b>LTA</b>      |                      |                 |
| Mean (SD)       | -0.09 (1.03)         | 0.842           |
| Median (Range)  | 0 (-1.75, 1.41)      | <b>&gt;0.99</b> |
| No. Missing (%) | 0 (0)                |                 |
| <b>LYAR</b>     |                      |                 |
| Mean (SD)       | -0.05 (0.43)         | 0.804           |
| Median (Range)  | -0.1 (-0.53, 0.72)   | <b>0.688</b>    |
| No. Missing (%) | 0 (0)                |                 |
| <b>NFATC1</b>   |                      |                 |
| Mean (SD)       | -0.06 (0.61)         | 0.831           |
| Median (Range)  | 0 (-0.86, 0.66)      | <b>&gt;0.99</b> |
| No. Missing (%) | 0 (0)                |                 |
| <b>NFATC2</b>   |                      |                 |
| Mean (SD)       | 0.01 (0.79)          | 0.977           |
| Median (Range)  | 0 (-1.2, 1.13)       | <b>&gt;0.99</b> |
| No. Missing (%) | 0 (0)                |                 |
| <b>NFATC3</b>   |                      |                 |
| Mean (SD)       | 0.02 (0.23)          | 0.816           |
| Median (Range)  | 0 (-0.26, 0.39)      | <b>&gt;0.99</b> |
| No. Missing (%) | 0 (0)                |                 |
| <b>NOTCH1</b>   |                      |                 |
| Mean (SD)       | 0.14 (1)             | 0.753           |
| Median (Range)  | -0.2 (-0.73, 2.1)    | <b>0.688</b>    |
| No. Missing (%) | 0 (0)                |                 |
| <b>PDCD1</b>    |                      |                 |
| Mean (SD)       | -6.57 (8.21)         | 0.107           |
| Median (Range)  | -3.4 (-23.11, -1.96) | <b>0.031</b>    |
| No. Missing (%) | 0 (0)                |                 |
| <b>PPP2R2D</b>  |                      |                 |
| Mean (SD)       | 0.08 (0.46)          | 0.687           |
| Median (Range)  | 0.1 (-0.69, 0.62)    | <b>0.688</b>    |
| No. Missing (%) | 0 (0)                |                 |
| <b>PRF1</b>     |                      |                 |
| Mean (SD)       | -0.4 (0.65)          | 0.198           |
| Median (Range)  | -0.4 (-1.08, 0.51)   | <b>0.219</b>    |
| No. Missing (%) | 0 (0)                |                 |
| <b>PTGER2</b>   |                      |                 |
| Mean (SD)       | 0.27 (0.3)           | 0.075           |

|                 |                   |                 |
|-----------------|-------------------|-----------------|
| Median (Range)  | 0.1 (0.05, 0.66)  | <b>0.031</b>    |
| No. Missing (%) | 0 (0)             |                 |
| <b>PTPN2</b>    |                   |                 |
| Mean (SD)       | 0.09 (0.39)       | 0.575           |
| Median (Range)  | 0.1 (-0.53, 0.61) | <b>0.438</b>    |
| No. Missing (%) | 0 (0)             |                 |
| <b>RGS16</b>    |                   |                 |
| Mean (SD)       | 0.35 (0.63)       | 0.229           |
| Median (Range)  | 0.4 (-0.58, 1.07) | <b>0.219</b>    |
| No. Missing (%) | 0 (0)             |                 |
| <b>RORC</b>     |                   |                 |
| Mean (SD)       | -0.36 (2.13)      | 0.696           |
| Median (Range)  | 0.1 (-4.38, 2.02) | <b>&gt;0.99</b> |
| No. Missing (%) | 0 (0)             |                 |
| <b>SELL</b>     |                   |                 |
| Mean (SD)       | 0.16 (0.28)       | 0.227           |
| Median (Range)  | 0.1 (-0.16, 0.56) | <b>0.563</b>    |
| No. Missing (%) | 0 (0)             |                 |
| <b>SMAD2</b>    |                   |                 |
| Mean (SD)       | 0.2 (0.38)        | 0.257           |
| Median (Range)  | 0.2 (-0.22, 0.75) | <b>0.563</b>    |
| No. Missing (%) | 0 (0)             |                 |
| <b>SOCS1</b>    |                   |                 |
| Mean (SD)       | 0.2 (0.45)        | 0.325           |
| Median (Range)  | 0.1 (-0.3, 1.02)  | <b>0.313</b>    |
| No. Missing (%) | 0 (0)             |                 |
| <b>SOCS3</b>    |                   |                 |
| Mean (SD)       | 0.05 (0.31)       | 0.72            |
| Median (Range)  | 0.1 (-0.29, 0.47) | <b>&gt;0.99</b> |
| No. Missing (%) | 0 (0)             |                 |
| <b>TBX21</b>    |                   |                 |
| Mean (SD)       | 0.1 (0.58)        | 0.693           |
| Median (Range)  | 0 (-0.61, 0.86)   | <b>0.844</b>    |
| No. Missing (%) | 0 (0)             |                 |
| <b>TNF</b>      |                   |                 |
| Mean (SD)       | 0.21 (0.48)       | 0.324           |
| Median (Range)  | 0 (-0.22, 0.84)   | <b>0.688</b>    |
| No. Missing (%) | 0 (0)             |                 |

|                 |                     |                 |
|-----------------|---------------------|-----------------|
| <b>TNFRSF14</b> |                     |                 |
| Mean (SD)       | 0.03 (0.35)         | 0.84            |
| Median (Range)  | 0.1 (-0.48, 0.43)   | <b>&gt;0.99</b> |
| No. Missing (%) | 0 (0)               |                 |
| <b>TNFRSF18</b> |                     |                 |
| Mean (SD)       | -1.3 (2.4)          | 0.243           |
| Median (Range)  | -0.4 (-4.99, 1.26)  | <b>0.438</b>    |
| No. Missing (%) | 0 (0)               |                 |
| <b>TNFRSF4</b>  |                     |                 |
| Mean (SD)       | -184.62 (390.98)    | 0.3             |
| Median (Range)  | 0.1 (-974.91, 2.01) | <b>&gt;0.99</b> |
| No. Missing (%) | 0 (0)               |                 |
| <b>TNFRSF8</b>  |                     |                 |
| Mean (SD)       | 10.21 (22.69)       | 0.321           |
| Median (Range)  | 0.8 (0, 56.46)      | <b>0.059</b>    |
| No. Missing (%) | 0 (0)               |                 |
| <b>TNFRSF9</b>  |                     |                 |
| Mean (SD)       | -0.58 (1.3)         | 0.323           |
| Median (Range)  | -0.2 (-2.46, 1.12)  | <b>0.313</b>    |
| No. Missing (%) | 0 (0)               |                 |
| <b>TNFSF10</b>  |                     |                 |
| Mean (SD)       | -0.39 (0.87)        | 0.33            |
| Median (Range)  | -0.6 (-1.28, 1.2)   | <b>0.313</b>    |
| No. Missing (%) | 0 (0)               |                 |
| <b>TNFSF14</b>  |                     |                 |
| Mean (SD)       | 0.08 (0.7)          | 0.778           |
| Median (Range)  | 0.2 (-1.18, 0.67)   | <b>0.688</b>    |
| No. Missing (%) | 0 (0)               |                 |
| <b>TNFSF8</b>   |                     |                 |
| Mean (SD)       | -1.81 (3.19)        | 0.223           |
| Median (Range)  | -0.2 (-8.1, -0.06)  | <b>0.031</b>    |
| No. Missing (%) | 0 (0)               |                 |
| <b>TOB1</b>     |                     |                 |
| Mean (SD)       | -0.09 (0.53)        | 0.707           |
| Median (Range)  | 0 (-1.05, 0.42)     | <b>&gt;0.99</b> |
| No. Missing (%) | 0 (0)               |                 |
| <b>TXN</b>      |                     |                 |
| Mean (SD)       | 0.08 (0.44)         | 0.67            |
| Median (Range)  | 0.1 (-0.48, 0.62)   | <b>0.688</b>    |

|                 |                    |              |
|-----------------|--------------------|--------------|
| No. Missing (%) | 0 (0)              |              |
| <b>XCL1</b>     |                    |              |
| Mean (SD)       | 227.11 (553.15)    | 0.361        |
| Median (Range)  | 0.8 (-1.1, 1356.2) | <b>0.438</b> |
| No. Missing (%) | 0 (0)              |              |

\*P-value is based on paired T-test and Wilcoxon signed Rank Test.



**A** Gaussian Mixture Model Training (Trial Patients)

| Patients | Response Status | Predicted Response Status |
|----------|-----------------|---------------------------|
| 1        | Nonresponder    | Responder                 |
| 10       | Nonresponder    | Nonresponder              |
| 22       | Nonresponder    | Nonresponder              |
| 40       | Nonresponder    | Nonresponder              |
| 14       | Nonresponder    | Nonresponder              |
| 17       | Nonresponder    | Nonresponder              |
| 18       | Nonresponder    | Nonresponder              |
| 21       | Nonresponder    | Nonresponder              |
| 28       | Nonresponder    | Nonresponder              |
| 32       | Nonresponder    | Nonresponder              |
| 37       | Nonresponder    | Nonresponder              |
| 38       | Nonresponder    | Nonresponder              |
| 7        | Nonresponder    | Nonresponder              |
| 110      | Responder       | Responder                 |
| 16       | Responder       | Responder                 |
| 19       | Responder       | Responder                 |
| 52       | Responder       | Responder                 |
| 31       | Responder       | Nonresponder              |
| 15       | Responder       | Nonresponder              |

**B** Heat map of Gene Expression Levels (Primary CRC Cohort)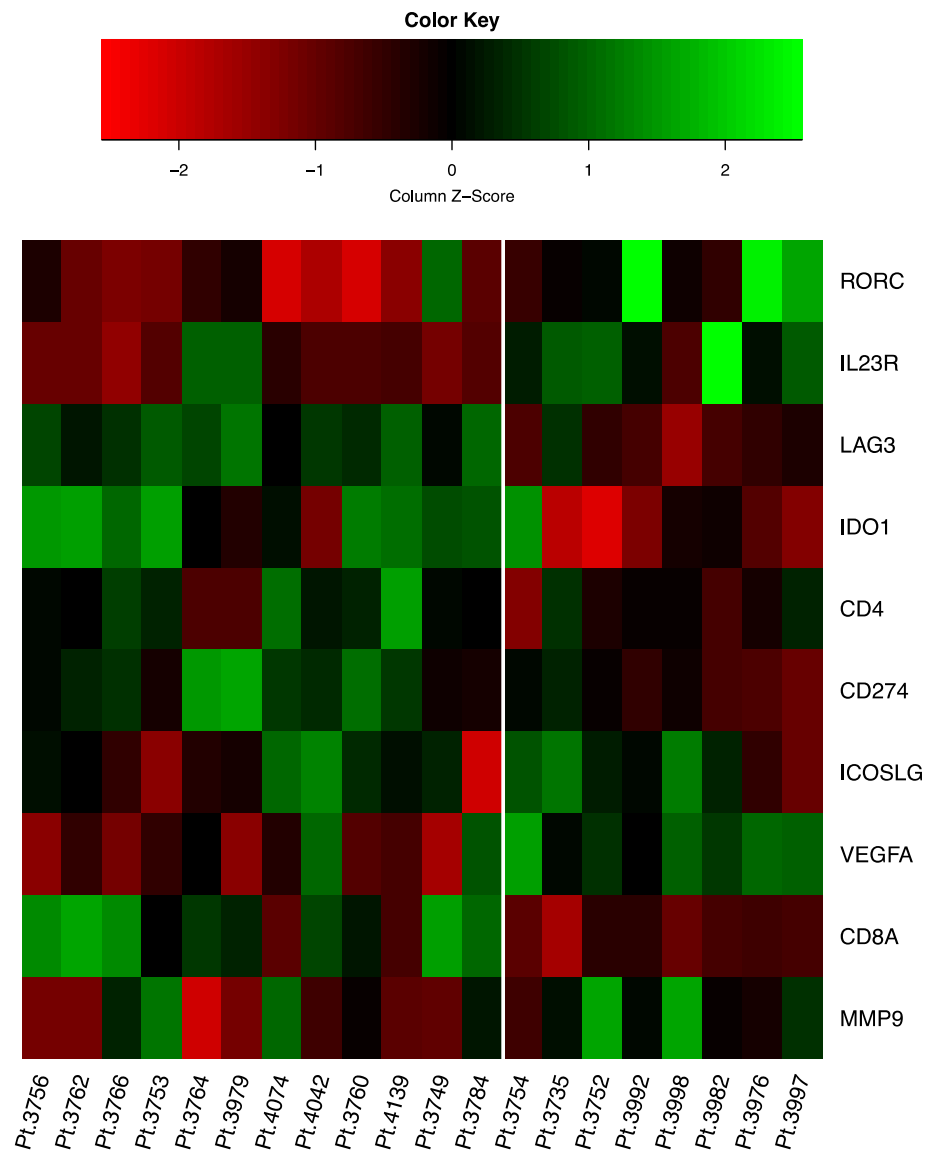

**Supplementary figure S1. Model of TiME in primary colon tumor of mCRC patients according to their clinical response to pembrolizumab.** **A**, Gaussian mixture model using the top 10 genes based on p-values were used to model the response status (Responder / Nonresponder) of those patients in the anti-PD1 (pembrolizumab) trial cohort. The model predictions for this training dataset are shown. **B**, Heat map of the gene expression levels of the top 10 genes for patients in the primary CRC cohort (scaling is done within a patient). Patients to the right of the white line are predicted responders; those to the left are predicted nonresponders.



**A**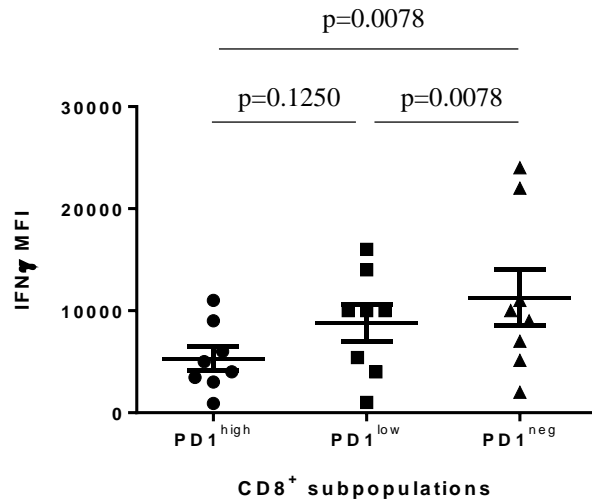**B**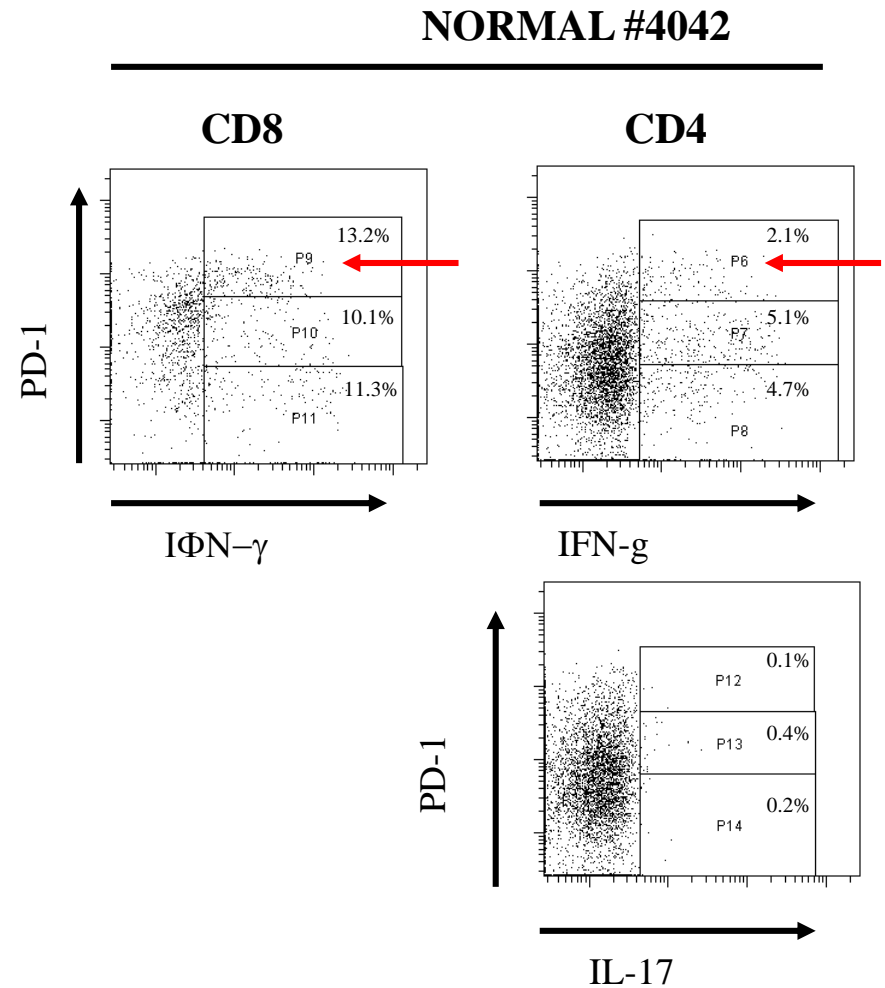

**Supplementary figure S2. IFN $\gamma$ -producing PD1<sup>hi</sup> CD8<sup>+</sup> T cells are not detected in the distal normal colon tissue.** **A**, Mean of fluorescence of IFN $\gamma$  production in PD1<sup>neg</sup>, PD1<sup>lo</sup> and PD1<sup>hi</sup> gates (see **fig.2&S3**). Comparison of IFN $\gamma$  expression in CD8<sup>+</sup> T cells according to the PD-1 expression (Neg, low and high). IFN $\gamma$  expression level is characterized by the mean of fluorescence (MFI) in the gate of interest. Means of IFN $\gamma$  MFI were compared between PD1<sup>neg</sup>, PD1<sup>Lo</sup> and PD1<sup>hi</sup> CD8<sup>+</sup> TILs. The graph shows the p values of Wilcoxon matched pairs signed rank test to compare the means. p<0.05 are significant. MFI are compared between groups using Wilcoxon matched-pairs signed rank test. **B**, flow cytometry analysis of T cells isolated from patient 4042 normal tissue distal from the tumors analyzed in **fig.2A**. Gates show the IFN $\gamma$  production in PD1<sup>neg</sup>, PD1<sup>Lo</sup> and PD1<sup>hi</sup> T cells. Red arrows point out the low proportion of IFN $\gamma$ <sup>+</sup>PD1<sup>hi</sup> populations.

**B.**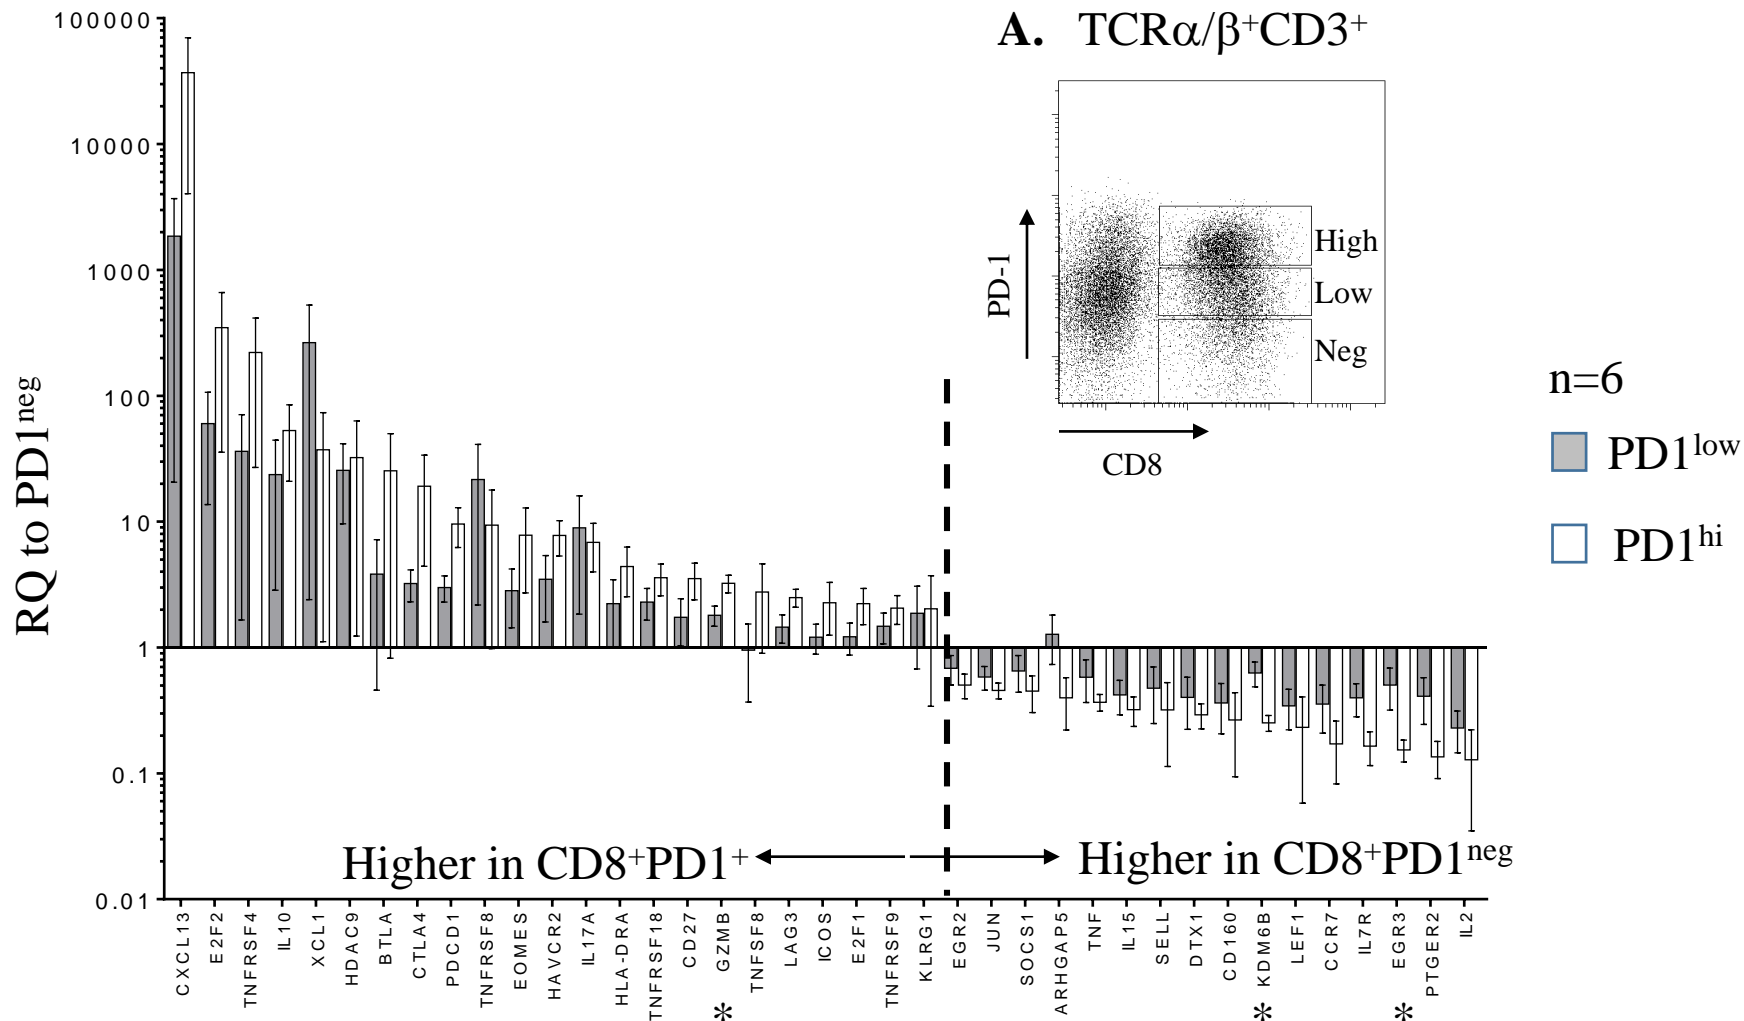

**Supplementary figure S3. Cell-sorted PD1<sup>hi</sup>CD8<sup>+</sup> TIL in CRC are exhausted T cells.** **A.** Gating strategy in CD8<sup>+</sup>TCR $\alpha/\beta$ <sup>+</sup> to dissociate PD1<sup>neg</sup>, PD-1<sup>lo</sup> and PD-1<sup>hi</sup> is shown. **B.** Expression of inflammation-related genes was assessed in PD1<sup>hi</sup> (open bars) and PD1<sup>lo</sup> (shaded bars) versus PD1<sup>neg</sup> CD8<sup>+</sup> TIL cell sorted from 6 CRC freshly resected. The graph represents  $RQ=2^{-\Delta\Delta Ct}$ .  $\Delta\Delta Ct=\Delta Ct-\Delta Ct_{PD1^{neg}}$  and  $\Delta Ct$  represent the CT of the gene of interest normalized by  $CT_{GUSB}$  and  $Ct_{GAPDH}$ . The graph represents all the genes out of 92 selected genes that reached a 2 fold (lower or higher) difference between PD1<sup>hi</sup> and PD1<sup>neg</sup>. Bars below the X axis represent genes which are downregulated compared to specimen-matched PD-1<sup>neg</sup> CD8 cells. Bars above the X axis represent genes which are upregulated compared to specimen-matched PD-1<sup>neg</sup> CD8 cells. Y axis displays log scale. p-value is based on paired T-test and Wilcoxon signed-rank test to compare means between PD1<sup>lo</sup> and PD1<sup>hi</sup> populations. \*, p<0.05 is significant.

## TUMOR

## NORMAL

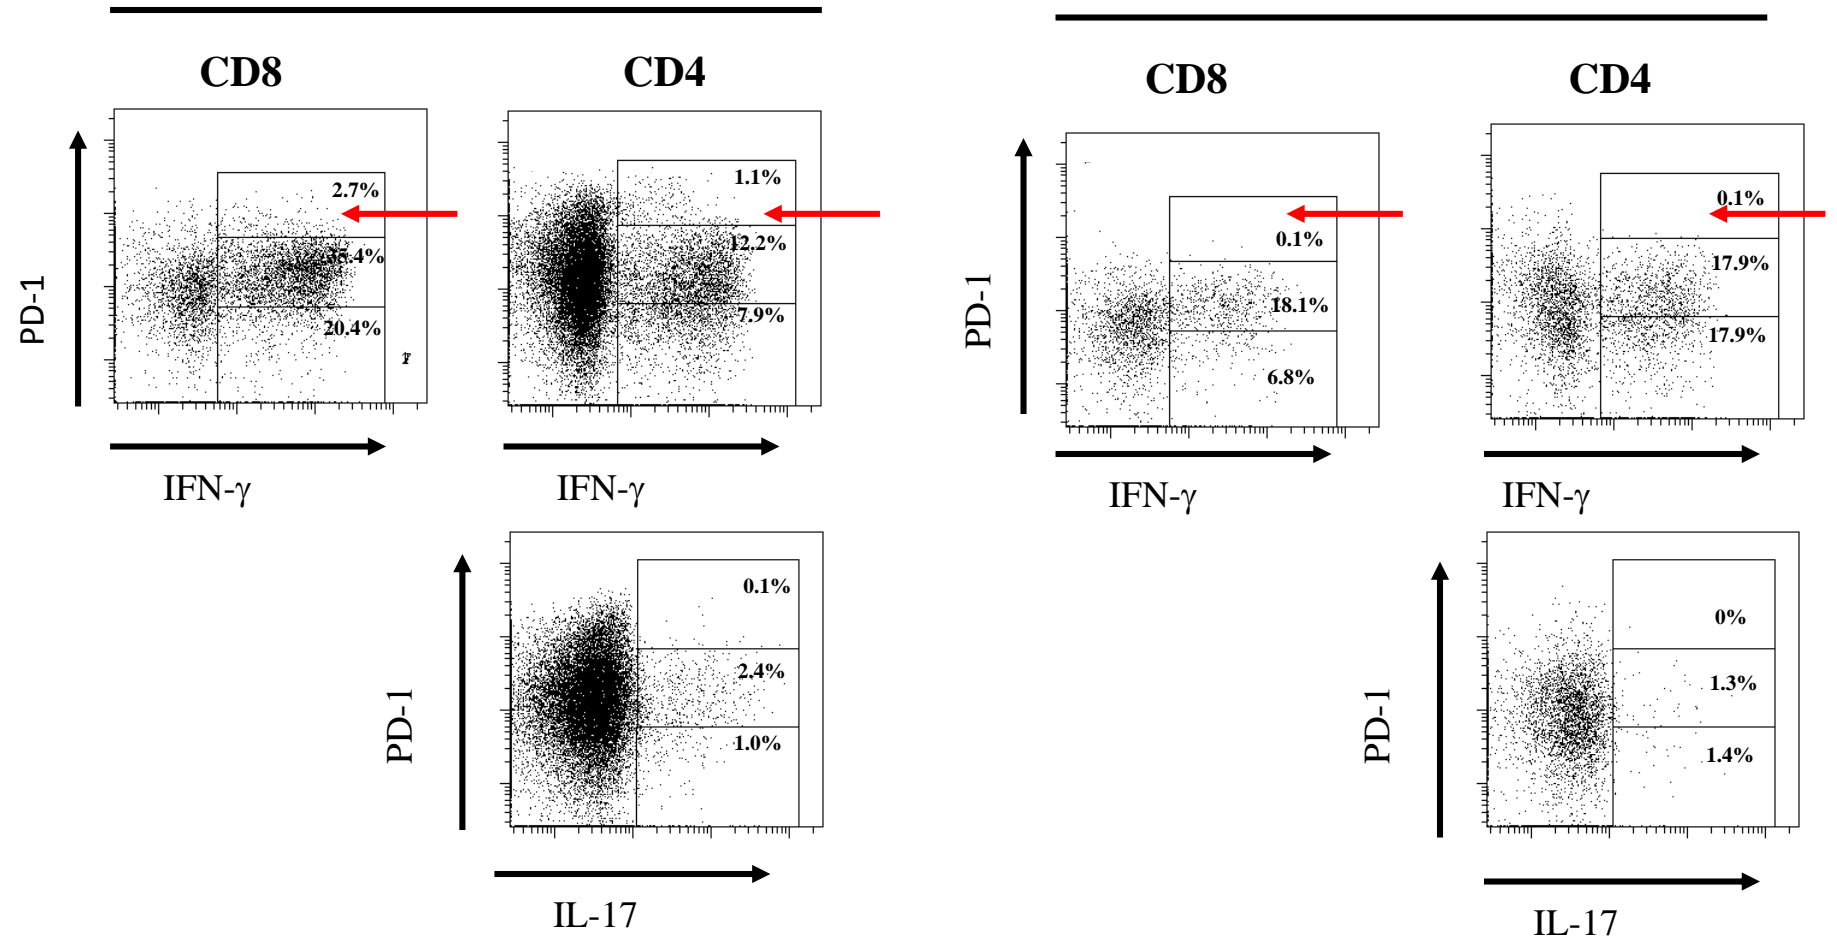

**Supplementary figure S4. MSI high MMRd CRC 3784 TILs include only few IFN $\gamma$ <sup>+</sup> PD1<sup>hi</sup> CD4<sup>+</sup> or CD8<sup>+</sup> T cells.** MFC analysis of tumor (A) and normal (B) colon-infiltrating T cells. In upper row, graphs show the IFN $\gamma$  production in PD1<sup>neg</sup>, PD1<sup>lo</sup>, PD1<sup>hi</sup> CD8<sup>+</sup> T cells (left dot plot), and CD4<sup>+</sup> T cells (right dot plot). In lower row, graphs showed IL17 production in PD1<sup>neg</sup>, PD1<sup>lo</sup>, PD1<sup>hi</sup> CD4<sup>+</sup> T cells. Red arrows indicate the IFN $\gamma$  in PD1<sup>hi</sup>

RNA expression  
(2-Dct)

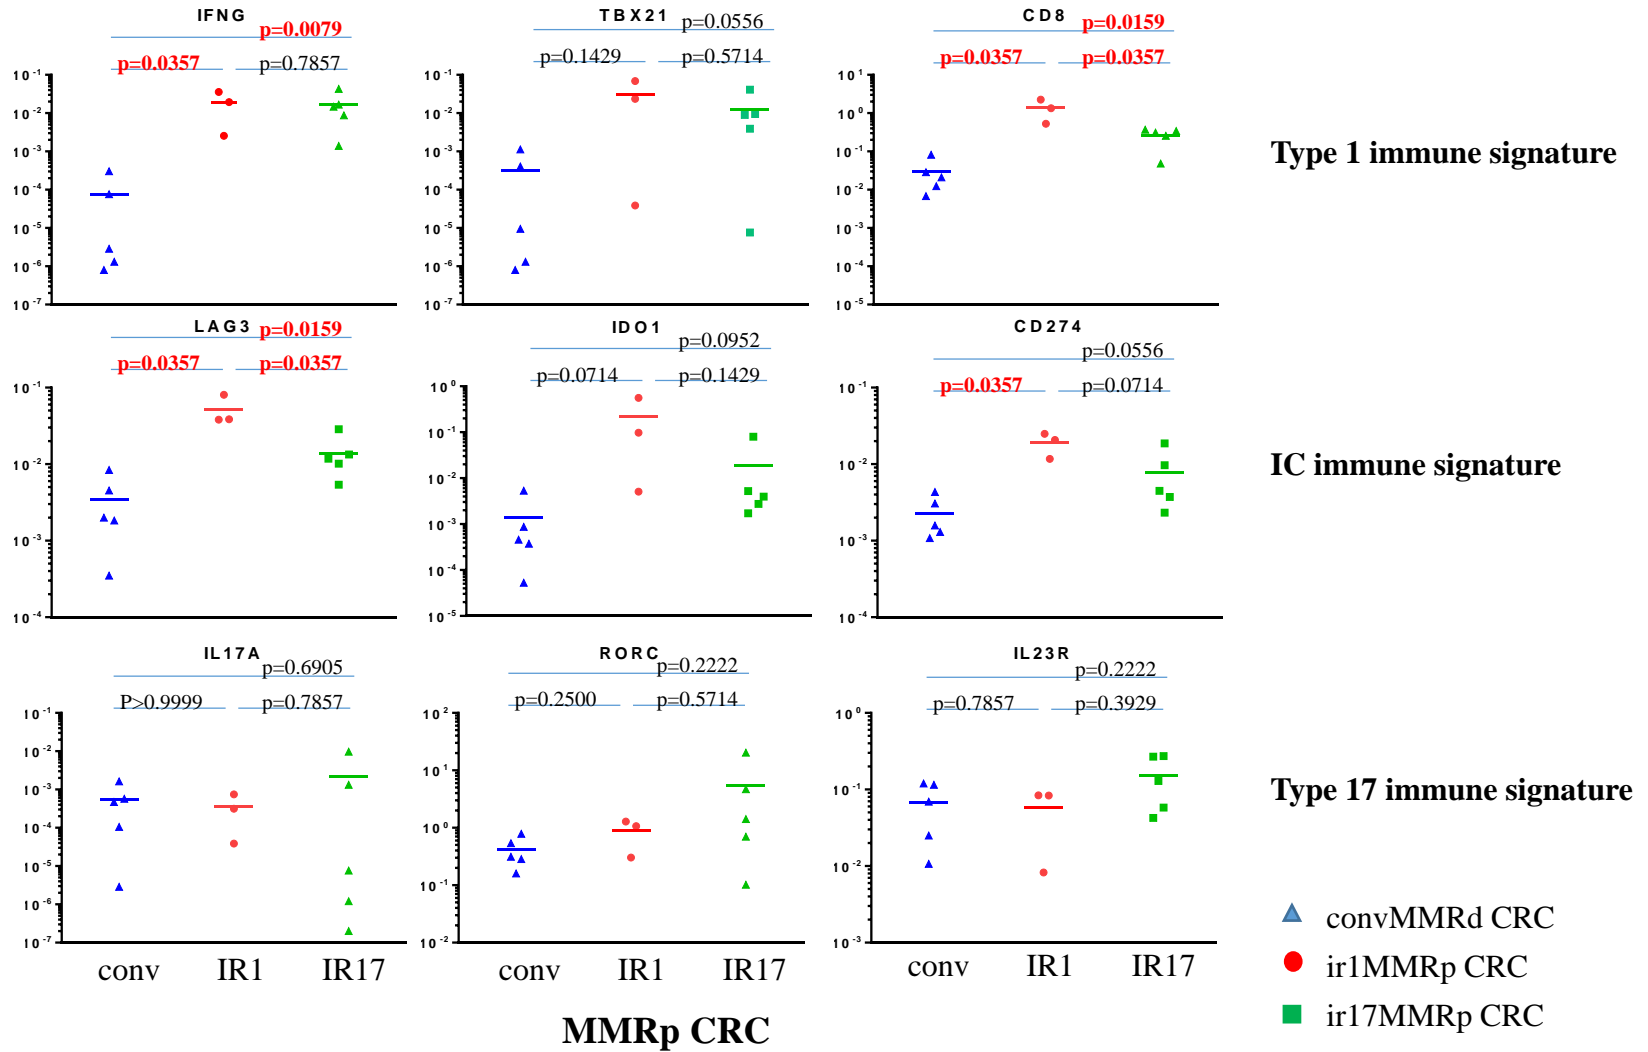

**Supplementary figure S5. Gene expression analysis in conventional MMRp (convMMRp; blue triangles), Type 1 immunoreactive MMRp (ir1MMRp; red circles) and type 17 immunoreactive MMRp (ir17MMRp; green squares) colon tumors.** Type 1 immunity- (top row), immune checkpoint- (IC; middle row)- and type17 immunity- (bottom row)-associated genes were tested for their expression in FFPE tumor tissue using taqman qRT-PCR. Means of expression were compared between groups using individual Mann-Whitney tests.  $p < 0.05$  are significant.



3749

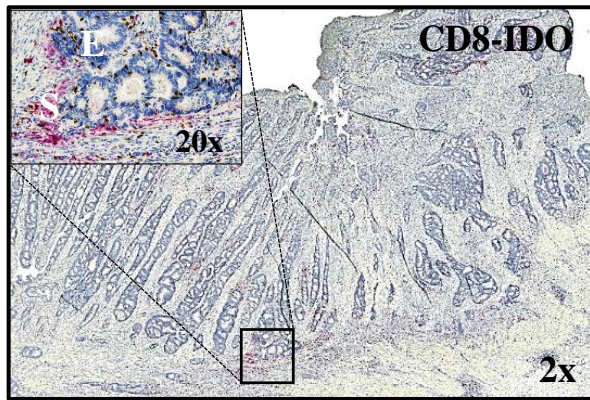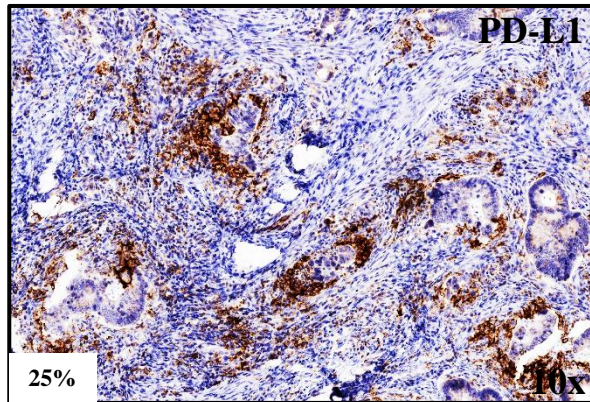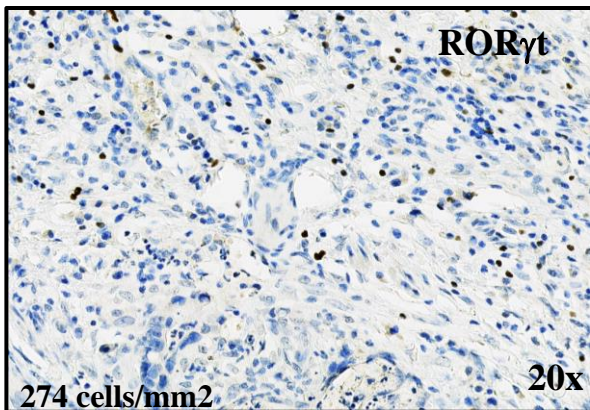

4074

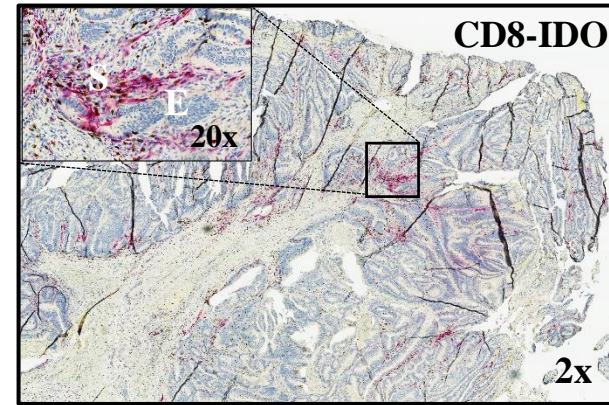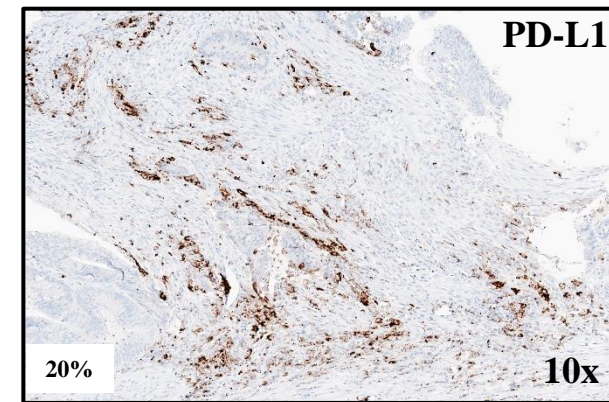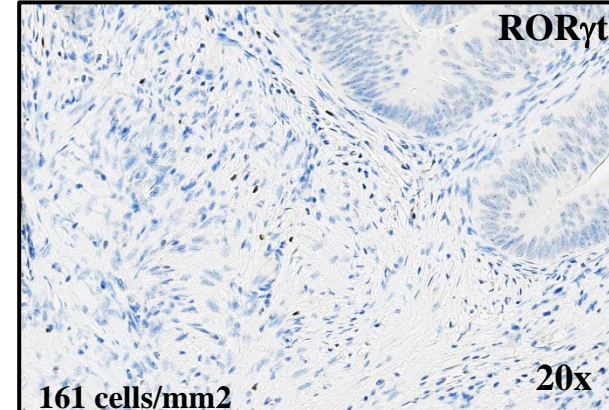

**Supplementary Figure S6. IHC staining on type 17 immunoreactive MMRp CRC.** Dual staining IDO1(red)/CD8(brown) (Top), PD-L1 (middle) and ROR $\gamma$ T (bottom) in representative type 17 immunoreactive MMRp resected primary CRC (3749 and 4074). S, stroma; E, epithelial cells. ROR $\gamma$ T cells densities expressed as number of cells/mm<sup>2</sup> in tumor invasive front.



3756

conv MMRp

3766

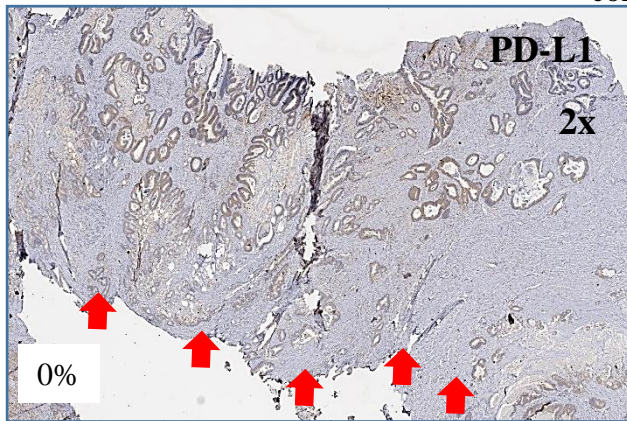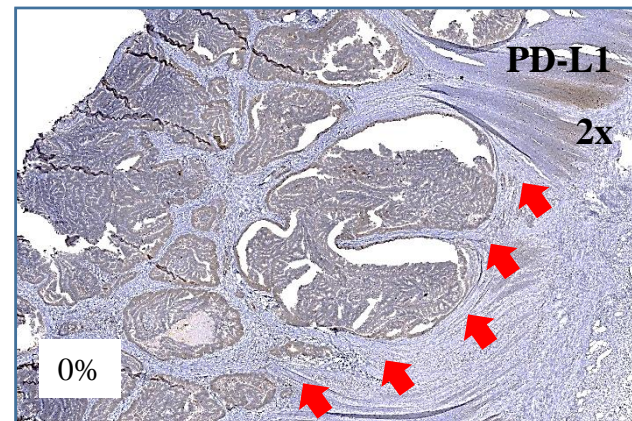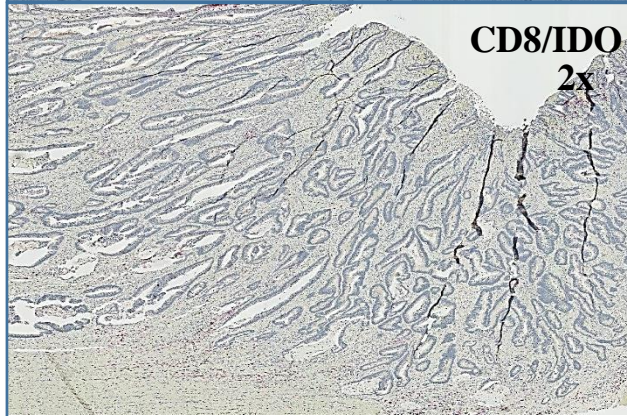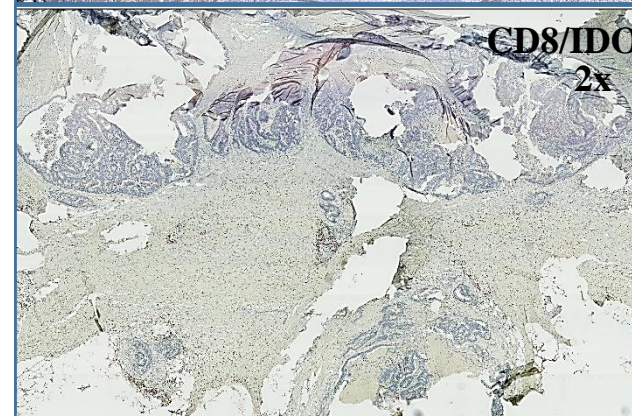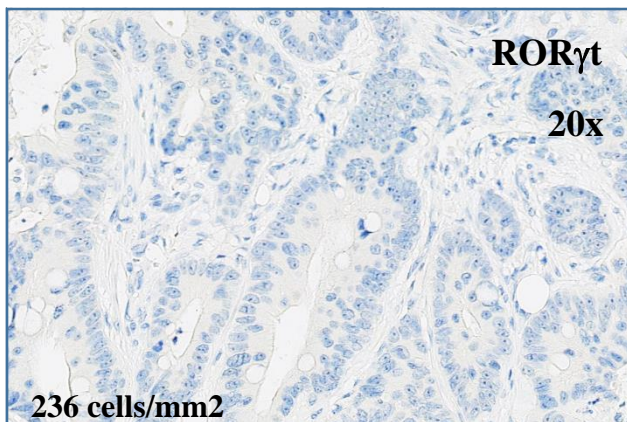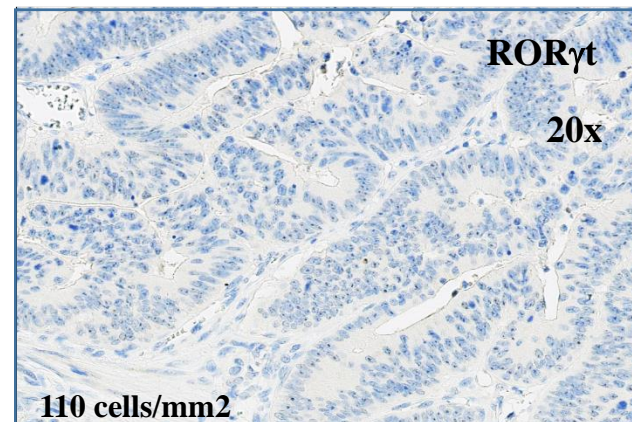

**Supplementary Figure S7. IHC staining on conventional MMRp CRC.** PD-L1 (Top), dual staining IDO1(red)/CD8(brown) (middle), and ROR $\gamma$ T (bottom) stainings in representative conventional MMRp resected primary CRC (3756 and 3766). Red arrows indicate the invasive front. ROR $\gamma$ T cells densities expressed as number of cells/mm<sup>2</sup> in annotated tumor invasive front.

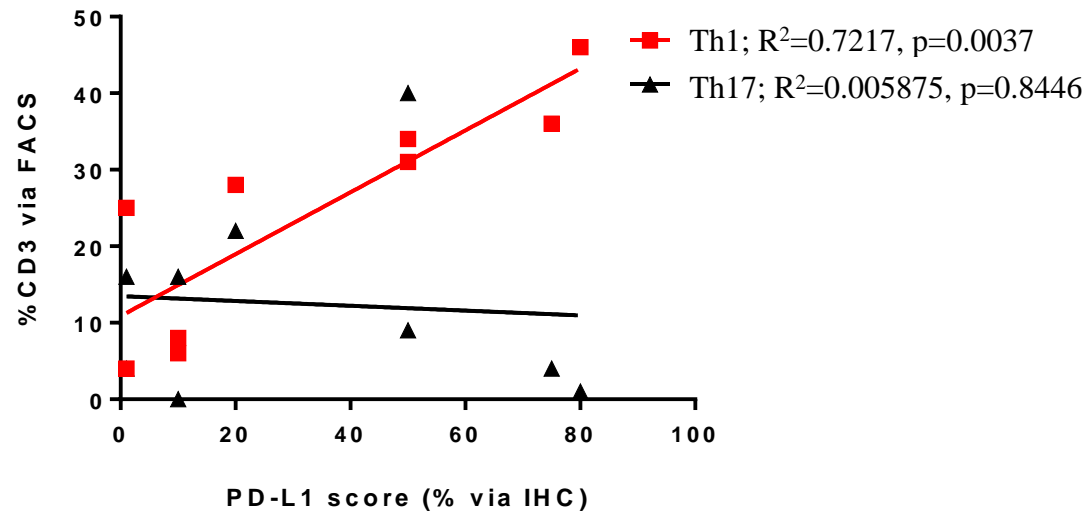

**Supplementary figure S8. Correlation between the PD-L1 expression in IF of primary colon tumors and the proportion of Th1 and Th17 in TILs.** For each colon tumor specimen, TIL were freshly isolated for intracellular cytokine and flow cytometry analysis as well as FFPE tissue sections were obtained for PD-L1 IHC and expression scoring. CD4<sup>+</sup>IFN $\gamma$ <sup>+</sup> (Th1, red squares) and CD4<sup>+</sup>IL17<sup>+</sup> (Th17, black triangles) T cells infiltration are expressed as % of the CD3<sup>+</sup> T cells. PD-L1 was blindly scored independently by two pathologists. The graph shows the linear regression with R<sup>2</sup> coefficient and p values. Significant p values <0.05

**A.**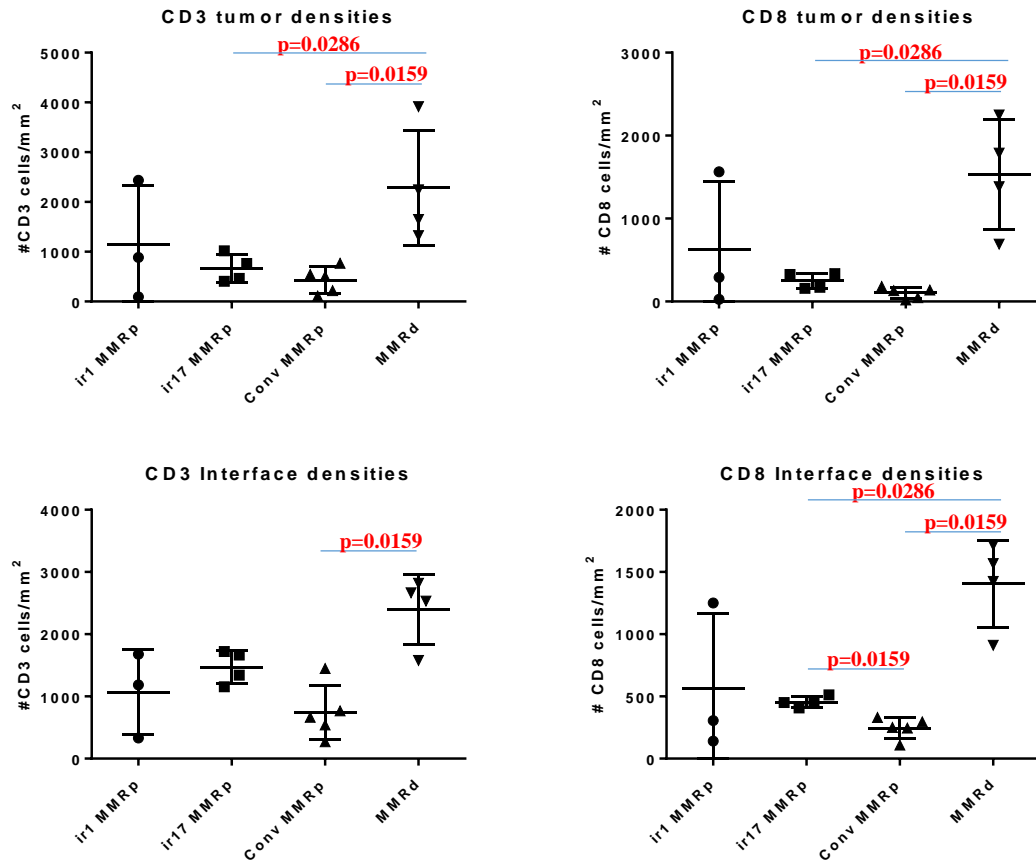**B.**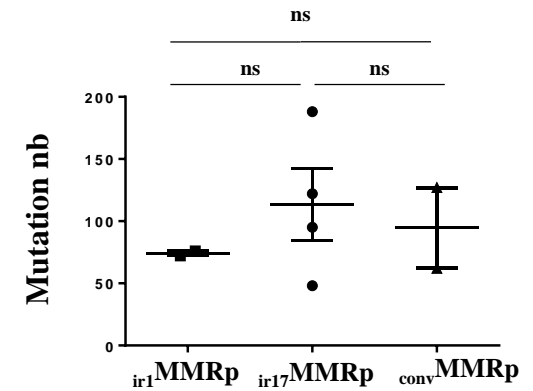

**Supplementary Figure S9. CD3 and CD8 cells quantification by IHC and tumor mutation numbers in untreated resected primary CRC lesions.** **A**, CD3 and CD8 digital image quantification in resected primary colon tumors of untreated CRC patients segregated by their MMR status and immunoreactivity,  $ir_1$ MMRp,  $ir_{17}$ MMRp,  $conv$ MMRp and MMRd CRC specimens. Scoring was performed independently by two pathologists. Mann-Whitney test,  $p < 0.05$  are considered significant. **B**, mutations number in resected primary colon tumor of untreated CRC patients segregated by their immunoreactivity,  $ir_1$ MMRp,  $ir_{17}$ MMRp, and  $conv$ MMRp specimens and for which exomic sequencing and somatic mutations were characterized (unknown in  $ir_1$ MMRp #3754, MMRp #3756, 3764, 3766).



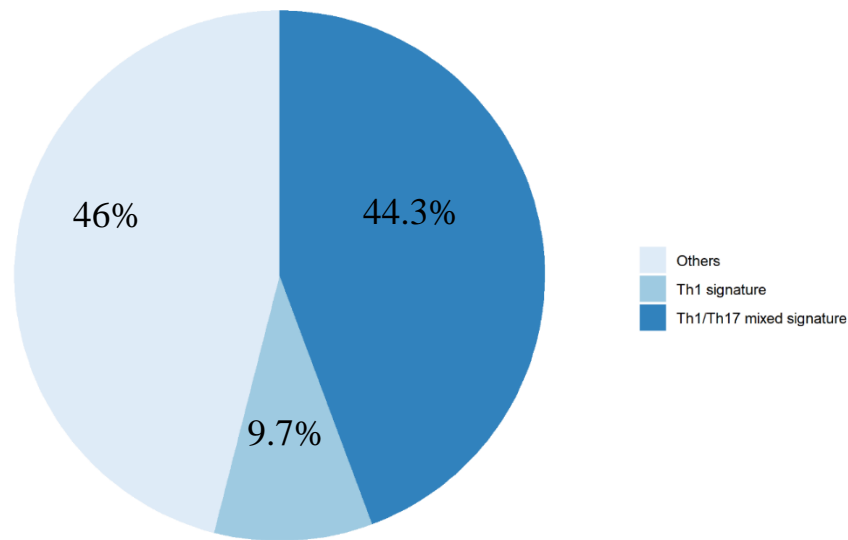

**Supplementary Figure S10. Detection of Type 1 and Type 17 immunoreactive MMRp CRC samples in TCGA database.** 176 MSS (or MMRp) CRC samples in the TCGA database have been tested for the detection of a Th1 (representative of Type 1 irMMRp CRC), mixed Th1/Th17 (representative of Type 17 irMMRp CRC) immune signatures based on the analysis of the expression of the genes *IFNG/TBX21/IDO1* (Th1) and *IL17A/RORC/IL23R* (Th17). The details of the gene expression are provided in **Supplementary Table S7** .
